# Supplementary material for: The effect of interlayer stacking arrangements in two dimensional NiOOH on water oxidation catalysis
Source: Royal Society of Chemistry journal article supplement (doi:10.1039/d1cp05383c), 2021-12-09
Supplement: d1cp05383c1.pdf [file d1cp05383c1.pdf]

## SUPPORTING INFORMATION:

### The effect of interlayer stacking arrangements in two dimensional NiOOH on water oxidation catalysis

*Eitan Yohanan and Maytal Caspary Toroker*

**Table S1.** Corrections added to the free energy calculation of molecules involved in water oxidation [1].

| molecule         | $E_{\text{tot}}$ [eV] | ZPE [eV] | TS [eV] |
|------------------|-----------------------|----------|---------|
| H <sub>2</sub>   | -6.77                 | 0.31     | 0.40    |
| O <sub>2</sub>   | -9.87                 | 0.10     | 0.63    |
| H <sub>2</sub> O | -14.23                | 0.60     | 0.67    |

**Table S2.** Corrections added to the free energy calculation of water oxidation on pure NiOOH [1].

| Reaction                  | Delta H [eV] | Delta ZPE [eV] | Entropy [eV] |
|---------------------------|--------------|----------------|--------------|
| *OH <sub>2</sub> to *OH   | 0.04         | -0.21          | -0.20        |
| *OH to *'OH <sub>2</sub>  | -0.06        | 0.02           | 0.47         |
| *'OH <sub>2</sub> to *'OH | 0.04         | -0.22          | -0.20        |
| *'OH to *OH <sub>2</sub>  | 0.04         | -0.09          | -0.16        |

**Table S3.** Total energy differences calculated on reaction \*OH to \*O with and without vdW corrections.

| $E_{\text{tot}}$ [eV] | dE (with vdW) | dE (without vdW) | DIFF |
|-----------------------|---------------|------------------|------|
| Non - displaced       | 1.11          | 1.15             | 0.04 |
| OUT 1                 | 1.13          | 1.15             | 0.02 |
| OUT 2                 | 1.06          | 1.07             | 0.01 |
| OUT 3                 | 0.48          | 0.49             | 0.01 |
| OUT 4                 | -1.71         | -1.72            | 0.01 |
| OUT 5                 | 4.28          | 4.27             | 0.01 |
| ROT 2                 | 1.31          | 1.33             | 0.02 |
| ROT 4                 | 1.41          | 1.44             | 0.03 |
| ROT 6                 | 1.35          | 1.37             | 0.02 |
| ROT 8                 | 1.32          | 1.35             | 0.03 |
| ROT 10                | 1.85          | 1.51             | 0.34 |

**Table S4.** Free energies for all displaced structures.

| Gibbs Free energy [eV] | *OH <sub>2</sub> to *OH | *OH to *'OH <sub>2</sub> | *'OH <sub>2</sub> to *'OH | *'OH to *OH <sub>2</sub> |
|------------------------|-------------------------|--------------------------|---------------------------|--------------------------|
| Non - displaced        | 1.71                    | 1.58                     | 1.55                      | -0.33                    |
| IN1                    | 1.45                    | 1.57                     | 1.41                      | 0.07                     |
| IN2                    | 1.42                    | 1.48                     | 1.42                      | 0.19                     |
| IN3                    | 1.63                    | 1.04                     | 1.73                      | 0.10                     |
| IN4                    | 2.63                    | 0.69                     | 2.49                      | -1.30                    |
| IN5                    | 1.42                    | 6.11                     | 1.50                      | -4.52                    |
| OUT1                   | 1.46                    | 1.58                     | 1.40                      | 0.07                     |
| OUT2                   | 1.45                    | 1.50                     | 1.41                      | 0.15                     |
| OUT3                   | 1.68                    | 0.91                     | 1.76                      | 0.15                     |
| OUT4                   | 2.79                    | -1.28                    | 2.80                      | 0.20                     |
| OUT5                   | 1.20                    | 4.70                     | 1.83                      | -3.12                    |
| 901                    | 1.44                    | 1.60                     | 1.38                      | 0.09                     |
| 902                    | 1.35                    | 1.65                     | 1.27                      | 0.23                     |
| 903                    | 1.36                    | 1.70                     | 1.27                      | 0.17                     |
| 904                    | 1.45                    | 1.75                     | 1.38                      | -0.07                    |
| ROT 2°                 | 1.46                    | 1.76                     | 1.37                      | -0.08                    |
| ROT 4°                 | 1.49                    | 1.87                     | 1.48                      | -0.32                    |
| ROT 6°                 | 1.66                    | 1.80                     | 2.01                      | -0.96                    |
| ROT 8°                 | 1.97                    | 1.78                     | 2.61                      | -1.85                    |
| ROT 10°                | 2.60                    | 1.94                     | 3.97                      | -4.00                    |

**Figure S1.** Charge density difference calculations between the NiOOH non-displaced supercell and its separated layers.

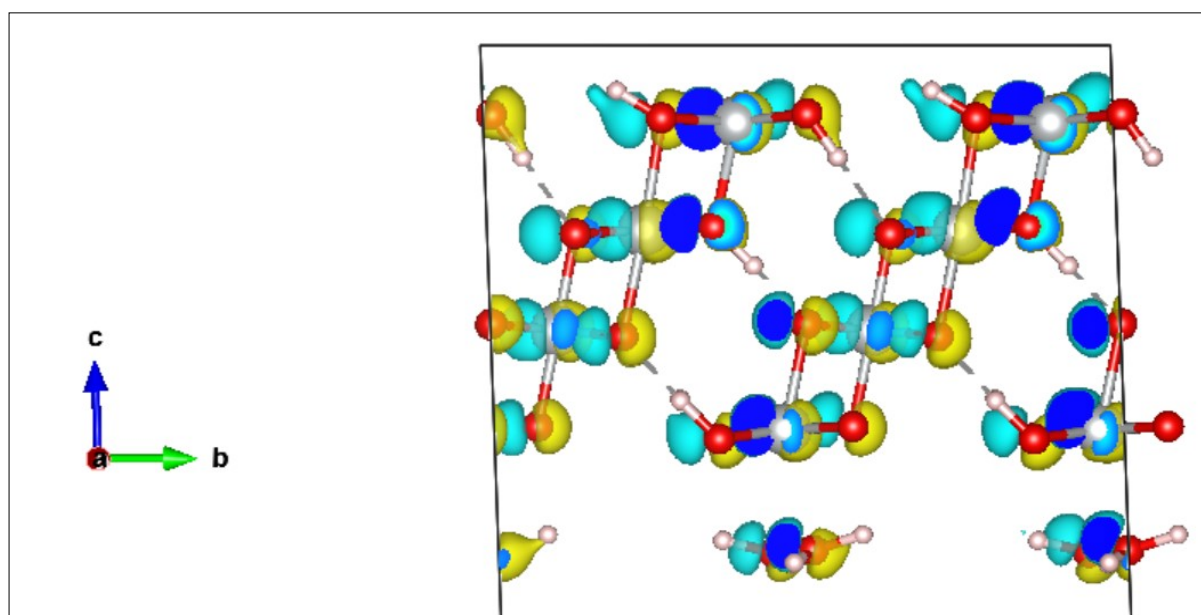

**Figure S2.** Total Gibbs energy for a reaction to take place and work function for (a) \*OH<sub>2</sub> OUT (b) \*OH IN (c) \*OH OUT

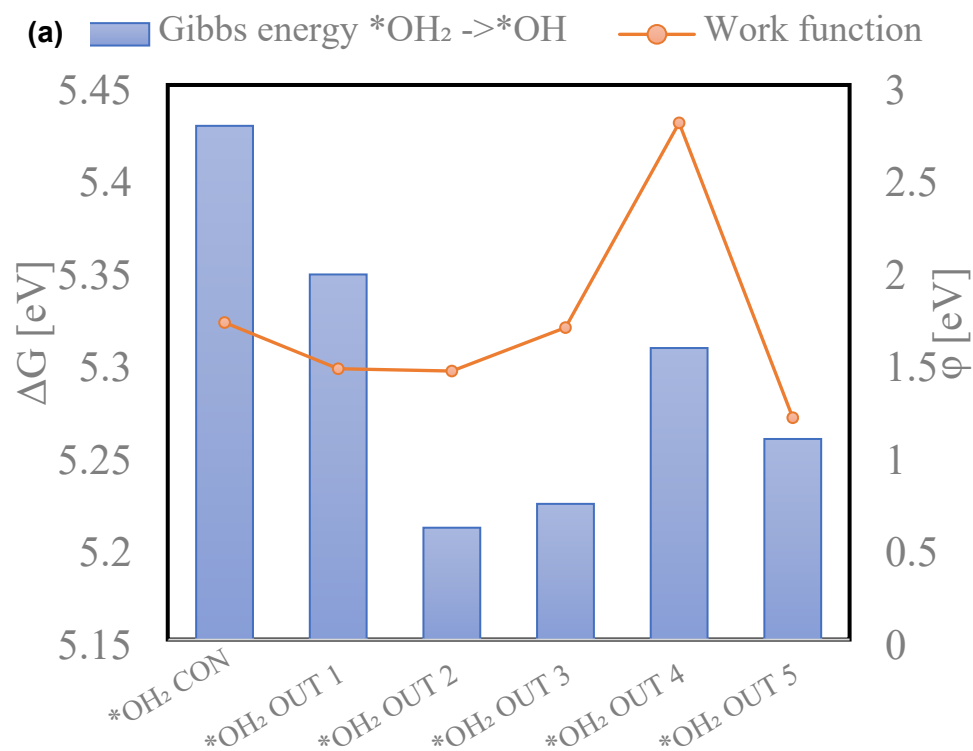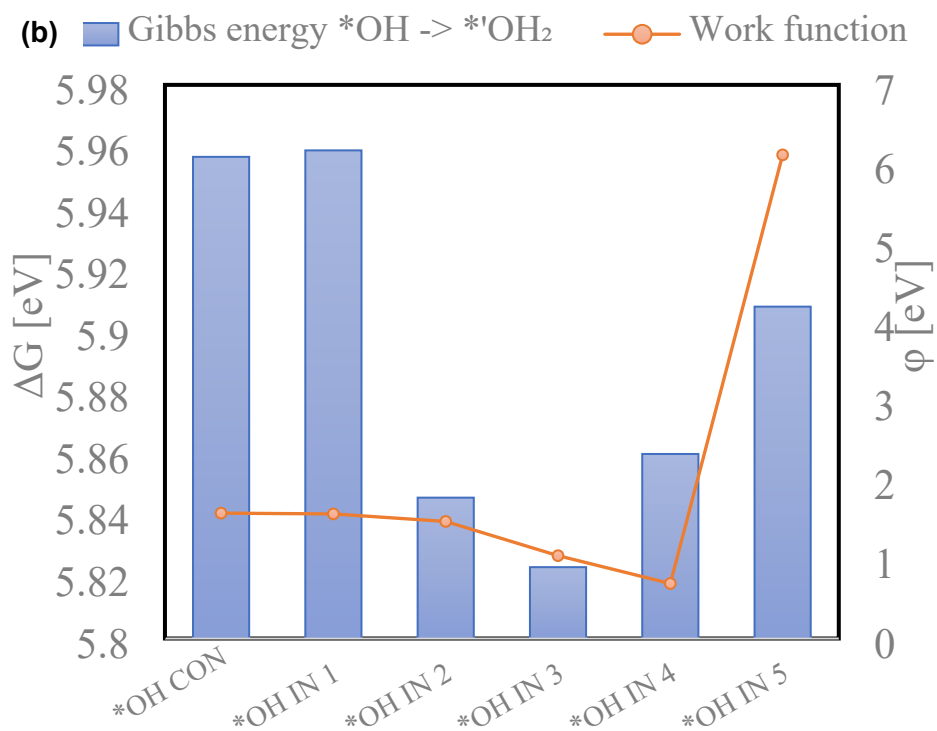

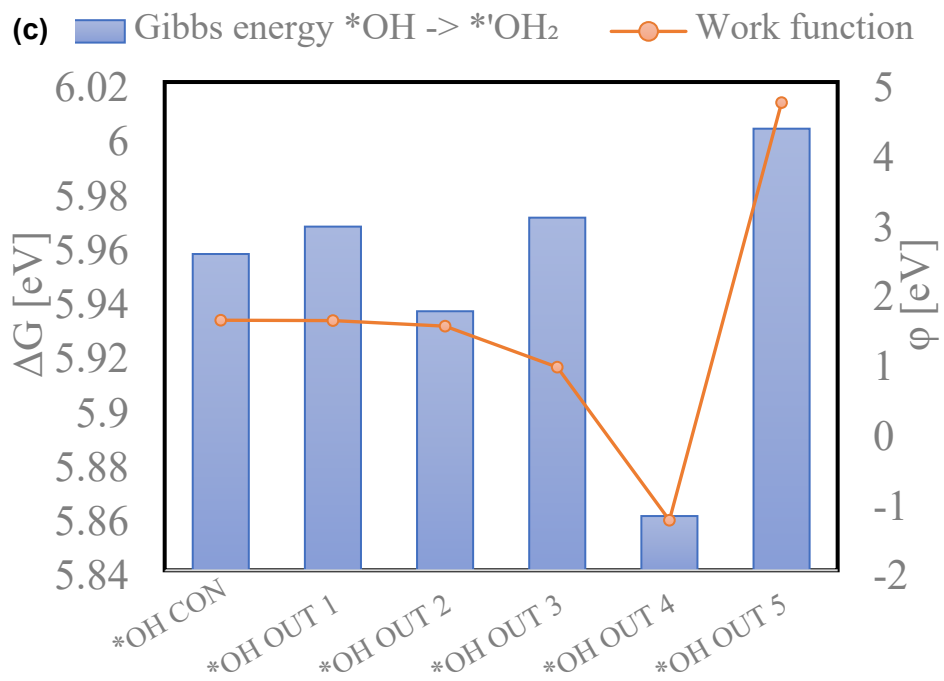

### Magnetism – additional observations

The decreased magnetization means that the charge became more delocalized and as a result a smaller work function is observed since it is easier to extract charge from a delocalized state. As seen in Figure 7, while the layers are sliding relatively to each other, the oxygen (atom number 3) on the left “static” layer is losing its bond with the closest hydrogen adjacent to him from the middle “dynamic” layer. Hence, the oxygen atom detached from the hydrogen atom gains greater localizations of its surrounded electrons. On the other hand, the oxygen atom attached to the hydrogen from the same moving layer (atom number 2) fasten its bond strength so the local magnetization of this oxygen is decreased. Overall, the delocalized bonding at the active site facilitates water oxidation at the transition between IN2 and IN3 that is more reactive.

**Table S5.** Magnetization of atoms around the active site of NiOOH. The atoms are numbered in Figure S8. The atoms are circled in Figure S8 according to the color representation.

| Number | colour representation | atom                  | A CON  | A IN 1 | A IN 2 | A IN 3 | A IN 4 |
|--------|-----------------------|-----------------------|--------|--------|--------|--------|--------|
| 1      |                       | Nickel (active site)  | 1.064  | 1.056  | 1.026  | 1.133  | 1.148  |
| 2      |                       | Oxygen (moving layer) | -0.052 | -0.052 | -0.039 | -0.041 | -0.027 |
| 3      |                       | Oxygen (static layer) | 0.04   | 0.043  | 0.053  | -0.058 | -0.08  |
| 4      |                       | Oxygen (static layer) | -0.1   | -0.1   | -0.088 | -0.115 | -0.114 |
| 5      |                       | Oxygen (static layer) | 0.073  | 0.083  | 0.104  | 0.099  | 0.09   |

**Figure S3.** Unit cell of the NiOOH surface with atom numbering. Atom 1 is Ni and serves as the active site. Atoms 2 - 5 are oxygens that surrounds the active site. Atom 3 is a part of the static layer. Atoms 1,2,4,5 are parts of the moving layer.

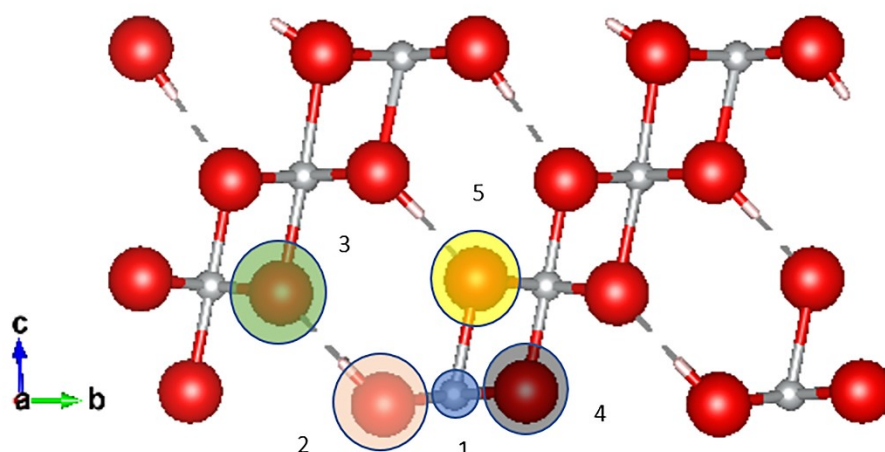

The relaxed geometries of the non-displaced intermediates below are given according to the following order: title, lattice vectors in Cartesian coordinates, atom types and numbers, respectively, and atom locations in fractional coordinates with respect to the lattice vectors. The atom coordinates are given according to the ordering in the atom type row (format of VASP geometrical coordinates files, POSCAR):

```
*OH2 converged Etot = -745.61 [eV]
1.0000000000000000
11.3830073077030249   -0.0145518001677524    0.0299494988469884
2.8300422780894365   11.6260518922604419   -0.1977923098970107
0.0720454903392915   -0.4803000766864406    27.2717372251130641
H      O      Ni
48     72     32
Direct
0.1274562380831875   0.2972157401895646    0.7520279191099972
0.1274562390831840   0.7972157131895659    0.7520279191099972
0.6274562780831837   0.2972157401895646    0.7520279191099972
0.6274562390831840   0.7972157131895659    0.7520279191099972
0.2166105389587641   0.4206034877099789    0.8462852342496592
0.2166105249587701   0.9206035177099743    0.8462852342496592
0.7166105789587675   0.4206034877099789    0.8462852342496592
0.7166105249587701   0.9206035177099743    0.8462852342496592
0.0619153304158003   0.0605879638239382    0.9222265167604859
0.0619153364158008   0.5605879358239358    0.9222265167604859
0.5619153154158028   0.0605879638239382    0.9222265167604859
0.5619153564158026   0.5605879358239358    0.9222265167604859
0.1455469821860946   0.2139404721936866    0.9685486617801213
0.1455469931860920   0.7139404071936919    0.9685486617801213
0.6455470221860907   0.2139404721936866    0.9685486617801213
0.6455469931860919   0.7139404071936919    0.9685486617801213
0.3772926346422690   0.2969160426686890    0.7533245846115250
0.3772926256422718   0.7969160536686863    0.7533245846115250
0.8772925946422657   0.2969160426686890    0.7533245846115250
0.8772926256422718   0.7969160536686863    0.7533245846115250
0.4748090424094571   0.4208360496935381    0.8463110621638225
```

|                    |                    |                    |
|--------------------|--------------------|--------------------|
| 0.4748090484094576 | 0.9208360026935378 | 0.8463110621638225 |
| 0.9748090824094605 | 0.4208360496935381 | 0.8463110621638225 |
| 0.9748091284094572 | 0.9208360026935378 | 0.8463110621638225 |
| 0.3089108355886200 | 0.0604921708216292 | 0.9215315227987381 |
| 0.3089108565886253 | 0.5604921438216234 | 0.9215315227987381 |
| 0.8089108155886254 | 0.0604921708216292 | 0.9215315227987381 |
| 0.8089107765886258 | 0.5604921438216234 | 0.9215315227987381 |
| 0.3956421334353314 | 0.2145009051991199 | 0.9679626556627179 |
| 0.3956421334353314 | 0.7145008781991140 | 0.9679626556627179 |
| 0.8956420934353281 | 0.2145009051991199 | 0.9679626556627179 |
| 0.8956420544353284 | 0.7145008781991140 | 0.9679626556627179 |
| 0.2603961303746720 | 0.3565653902250428 | 0.6546136429564773 |
| 0.2603961273746682 | 0.8565653822250422 | 0.6546136429564773 |
| 0.7603960513746690 | 0.3565653902250428 | 0.6546136429564773 |
| 0.7603960873746720 | 0.8565653822250422 | 0.6546136429564773 |
| 0.2982072255167158 | 0.4656811370273244 | 0.6384424136304141 |
| 0.2982072215167226 | 0.9656811290273237 | 0.6384424136304141 |
| 0.7982071855167195 | 0.4656811370273244 | 0.6384424136304141 |
| 0.7982072215167154 | 0.9656811290273237 | 0.6384424136304141 |
| 0.0476015437055782 | 0.4685171482087852 | 0.6391147657938573 |
| 0.0476015687055767 | 0.9685171012087849 | 0.6391147657938573 |
| 0.5476015637055799 | 0.4685171482087852 | 0.6391147657938573 |
| 0.5476015687055767 | 0.9685171012087849 | 0.6391147657938573 |
| 0.4578896079426912 | 0.0789946345812558 | 0.6584876684366537 |
| 0.4578896059426911 | 0.5789946175812509 | 0.6584876684366537 |
| 0.9578896479426875 | 0.0789946345812558 | 0.6584876684366537 |
| 0.9578896059426911 | 0.5789946175812509 | 0.6584876684366537 |
| 0.0590658259080006 | 0.0698394476625121 | 0.7339944022280845 |
| 0.0590658269080042 | 0.5698394586625094 | 0.7339944022280845 |
| 0.5590658359079943 | 0.0698394476625121 | 0.7339944022280845 |
| 0.5590658669079933 | 0.5698394586625094 | 0.7339944022280845 |
| 0.1492844204099074 | 0.2096937766173588 | 0.7960690526038591 |
| 0.1492844464099096 | 0.7096938076173578 | 0.7960690526038591 |
| 0.6492844204099074 | 0.2096937766173588 | 0.7960690526038591 |
| 0.6492844464099096 | 0.7096938076173578 | 0.7960690526038591 |
| 0.2315760159391450 | 0.3607860381316741 | 0.8735935809928945 |
| 0.2315760319391463 | 0.8607860301316733 | 0.8735935809928945 |
| 0.7315760759391429 | 0.3607860381316741 | 0.8735935809928945 |
| 0.7315760319391463 | 0.8607860301316733 | 0.8735935809928945 |
| 0.0718203226320654 | 0.5146144905824822 | 0.9523851372229470 |
| 0.0718203386320667 | 0.0146144825824815 | 0.9523851372229470 |
| 0.5718203426320670 | 0.5146144905824822 | 0.9523851372229470 |
| 0.5718202986320634 | 0.0146144825824815 | 0.9523851372229470 |
| 0.1128503520246848 | 0.3566177713769232 | 0.7252959857171298 |
| 0.1128503780246799 | 0.8566178023769223 | 0.7252959857171298 |
| 0.6128503920246811 | 0.3566177713769232 | 0.7252959857171298 |
| 0.6128503380246837 | 0.8566178023769223 | 0.7252959857171298 |
| 0.2003545287398803 | 0.0009009972942352 | 0.8048225739584094 |
| 0.2003545387398740 | 0.5009010132942223 | 0.8048225739584094 |
| 0.7003545087398786 | 0.0009009972942352 | 0.8048225739584094 |
| 0.7003545387398740 | 0.5009010132942223 | 0.8048225739584094 |
| 0.0454695752930197 | 0.1399035704398041 | 0.8685707928294726 |
| 0.0454695812930202 | 0.6399035624398034 | 0.8685707928294726 |
| 0.5454695852930135 | 0.1399035704398041 | 0.8685707928294726 |
| 0.5454695812930132 | 0.6399035624398034 | 0.8685707928294726 |
| 0.1288292217081488 | 0.2833373812028351 | 0.9495453365387424 |

|                    |                    |                    |
|--------------------|--------------------|--------------------|
| 0.1288292227081453 | 0.7833373532028327 | 0.9495453365387424 |
| 0.6288292217081487 | 0.2833373812028351 | 0.9495453365387424 |
| 0.6288292627081485 | 0.7833373532028327 | 0.9495453365387424 |
| 0.3103940057519188 | 0.0692230259271254 | 0.7340285179141715 |
| 0.3103940137519194 | 0.5692230509271240 | 0.7340285179141715 |
| 0.8103940657519166 | 0.0692230259271254 | 0.7340285179141715 |
| 0.8103940927519224 | 0.5692230509271240 | 0.7340285179141715 |
| 0.3990685009666904 | 0.2093540681110575 | 0.7971039288368936 |
| 0.3990684919666861 | 0.7093540791110549 | 0.7971039288368936 |
| 0.8990685409666866 | 0.2093540681110575 | 0.7971039288368936 |
| 0.8990685719666857 | 0.7093540791110549 | 0.7971039288368936 |
| 0.4897196806007531 | 0.3606416058270692 | 0.8736136022200497 |
| 0.4897197166007490 | 0.8606415978270686 | 0.8736136022200497 |
| 0.9897196806007530 | 0.3606416058270692 | 0.8736136022200497 |
| 0.9897196376007530 | 0.8606415978270686 | 0.8736136022200497 |
| 0.3217185397433994 | 0.5137860525094144 | 0.9514851609256840 |
| 0.3217185457433999 | 0.0137860065094106 | 0.9514851609256840 |
| 0.8217185797434028 | 0.5137860525094144 | 0.9514851609256840 |
| 0.8217185457434000 | 0.0137860065094106 | 0.9514851609256840 |
| 0.3629912277450012 | 0.3551781303150578 | 0.7260366750294127 |
| 0.3629912337450017 | 0.8551780843150540 | 0.7260366750294127 |
| 0.8629911877449978 | 0.3551781303150578 | 0.7260366750294127 |
| 0.8629911537450021 | 0.8551780843150540 | 0.7260366750294127 |
| 0.4507867766200069 | 0.0016068282898268 | 0.8057861097448601 |
| 0.4507867766200069 | 0.5016068042898247 | 0.8057861097448601 |
| 0.9507867766200070 | 0.0016068282898268 | 0.8057861097448601 |
| 0.9507868166200032 | 0.5016068042898247 | 0.8057861097448601 |
| 0.2854324077199301 | 0.1399078631773824 | 0.8685723044498879 |
| 0.2854324047199263 | 0.6399078551773747 | 0.8685723044498879 |
| 0.7854323287199342 | 0.1399078631773824 | 0.8685723044498879 |
| 0.7854323647199372 | 0.6399078551773747 | 0.8685723044498879 |
| 0.3788440965759003 | 0.2836745319631558 | 0.9488537043250266 |
| 0.3788441025759008 | 0.7836744849631555 | 0.9488537043250266 |
| 0.8788440965759003 | 0.2836745319631558 | 0.9488537043250266 |
| 0.8788440625758975 | 0.7836744849631555 | 0.9488537043250266 |
| 0.2265015457830906 | 0.4364012581199468 | 0.6461208744402108 |
| 0.2265015417830903 | 0.9364012501199461 | 0.6461208744402108 |
| 0.7265015057830874 | 0.4364012581199468 | 0.6461208744402108 |
| 0.7265015417830903 | 0.9364012501199461 | 0.6461208744402108 |
| 0.4616279343963403 | 0.4994431949580600 | 0.6477582118723924 |
| 0.4616279603963353 | 0.9994432259580590 | 0.6477582118723924 |
| 0.9616279343963332 | 0.4994431949580600 | 0.6477582118723924 |
| 0.9616279603963354 | 0.9994432259580590 | 0.6477582118723924 |
| 0.4614555055776192 | 0.4618375169495889 | 0.7321298642984702 |
| 0.4614555055776193 | 0.9618374699495958 | 0.7321298642984702 |
| 0.9614555055776192 | 0.4618375169495889 | 0.7321298642984702 |
| 0.9614554705776198 | 0.9618374699495958 | 0.7321298642984702 |
| 0.0503240855470339 | 0.1056714610498858 | 0.8011683776697617 |
| 0.0503241035470354 | 0.6056714050498883 | 0.8011683776697617 |
| 0.5503241355470310 | 0.1056714610498858 | 0.8011683776697617 |
| 0.5503241035470354 | 0.6056714050498883 | 0.8011683776697617 |
| 0.1382117075373332 | 0.2497234168971482 | 0.8703698666236088 |
| 0.1382117185373377 | 0.7497234278971455 | 0.8703698666236088 |
| 0.6382117075373331 | 0.2497234168971482 | 0.8703698666236088 |
| 0.6382116585373326 | 0.7497234278971455 | 0.8703698666236088 |
| 0.2242797365266858 | 0.4017447159971955 | 0.9467703651391517 |



|                                               |                     |                     |
|-----------------------------------------------|---------------------|---------------------|
| 0.2242797325266855                            | 0.9017447079972020  | 0.9467703651391517  |
| 0.7242797365266858                            | 0.4017447159971955  | 0.9467703651391517  |
| 0.7242796925266821                            | 0.9017447079972020  | 0.9467703651391517  |
| 0.2994018995652124                            | 0.1053559145337301  | 0.8012544316797132  |
| 0.2994019395652015                            | 0.6053558875337243  | 0.8012544316797132  |
| 0.7994018995652123                            | 0.1053559145337301  | 0.8012544316797132  |
| 0.7994019395652086                            | 0.6053558875337243  | 0.8012544316797132  |
| 0.3882887973140278                            | 0.2493616836265800  | 0.8711808494436990  |
| 0.3882888183140331                            | 0.7493617336265841  | 0.8711808494436990  |
| 0.8882889173140307                            | 0.2493616836265800  | 0.8711808494436990  |
| 0.8882889383140289                            | 0.7493617336265841  | 0.8711808494436990  |
| 0.4749188534802553                            | 0.4020824942171866  | 0.9466309634987687  |
| 0.4749188984802555                            | 0.9020824472171863  | 0.9466309634987687  |
| 0.9749188534802554                            | 0.4020824942171866  | 0.9466309634987687  |
| 0.9749188184802561                            | 0.9020824472171863  | 0.9466309634987687  |
| 0.2113682906347471                            | 0.4627953088802469  | 0.7317988968422563  |
| 0.2113682966347476                            | 0.9627952618802466  | 0.7317988968422563  |
| 0.7113682106347476                            | 0.4627953088802469  | 0.7317988968422563  |
| 0.7113682566347515                            | 0.9627952618802466  | 0.7317988968422563  |
| *OH converged $E_{\text{tot}} = -723.73$ [eV] |                     |                     |
| 1.0000000000000000                            |                     |                     |
| 11.41022860422251                             | 0.0040456190130826  | 0.0175891610695355  |
| 2.8580486266535443                            | 11.4539537926787709 | -0.1344915775607679 |
| 0.0440430944502599                            | -0.3689127777895857 | 26.1308390866089084 |
| H                                             | O                   | Ni                  |
| 44                                            | 72                  | 32                  |
| Direct                                        |                     |                     |
| 0.1341764377697885                            | 0.3083889342711856  | 0.7514904754233243  |
| 0.1341764337697882                            | 0.8083889262711850  | 0.7514904754233243  |
| 0.6341763977697923                            | 0.3083889342711856  | 0.7514904754233243  |
| 0.6341764337697882                            | 0.8083889262711850  | 0.7514904754233243  |
| 0.2235062544644251                            | 0.4147114183278546  | 0.8469181327664828  |
| 0.2235062604644256                            | 0.9147113713278543  | 0.8469181327664828  |
| 0.7235062944644213                            | 0.4147114183278546  | 0.8469181327664828  |
| 0.7235063404644251                            | 0.9147113713278543  | 0.8469181327664828  |
| 0.0682147731842591                            | 0.0575562855889586  | 0.9264769787506992  |
| 0.0682147721842554                            | 0.5575562625889603  | 0.9264769787506992  |
| 0.5682147731842591                            | 0.0575562855889586  | 0.9264769787506992  |
| 0.5682147321842592                            | 0.5575562625889603  | 0.9264769787506992  |
| 0.1542580619899852                            | 0.2070822859460293  | 0.9751647048133165  |
| 0.1542580529899880                            | 0.7070822979460303  | 0.9751647048133165  |
| 0.6542580219899889                            | 0.2070822859460293  | 0.9751647048133165  |
| 0.6542580529899880                            | 0.7070822979460303  | 0.9751647048133165  |
| 0.3762100714669216                            | 0.3092805444390123  | 0.7504410551178680  |
| 0.3762101114669250                            | 0.8092805174390136  | 0.7504410551178680  |
| 0.8762100714669216                            | 0.3092805444390123  | 0.7504410551178680  |
| 0.8762101114669250                            | 0.8092805174390136  | 0.7504410551178680  |
| 0.4807254144781368                            | 0.4189620749812732  | 0.8472740461666035  |
| 0.4807254504781397                            | 0.9189620669812726  | 0.8472740461666035  |
| 0.9807254144781368                            | 0.4189620749812732  | 0.8472740461666035  |
| 0.9807253704781402                            | 0.9189620669812726  | 0.8472740461666035  |
| 0.3145997157546176                            | 0.0572152486763002  | 0.9256570541506193  |
| 0.3145997217546181                            | 0.5572152016762999  | 0.9256570541506193  |
| 0.8145997157546176                            | 0.0572152486763002  | 0.9256570541506193  |
| 0.8145997617546215                            | 0.5572152016762999  | 0.9256570541506193  |
| 0.4036104471901751                            | 0.2076864439518857  | 0.9746947625556004  |

|                    |                    |                    |
|--------------------|--------------------|--------------------|
| 0.4036104391901745 | 0.7076864549518902 | 0.9746947625556004 |
| 0.9036104071901718 | 0.2076864439518857 | 0.9746947625556004 |
| 0.9036104391901745 | 0.7076864549518902 | 0.9746947625556004 |
| 0.1957007894588259 | 0.0753936832046662 | 0.6536470176282947 |
| 0.1957007794588250 | 0.5753936992046604 | 0.6536470176282947 |
| 0.6957007494588225 | 0.0753936832046662 | 0.6536470176282947 |
| 0.6957007794588250 | 0.5753936992046604 | 0.6536470176282947 |
| 0.0686762162467218 | 0.4758518291908018 | 0.6414547278468419 |
| 0.0686762122467215 | 0.9758518211908154 | 0.6414547278468419 |
| 0.5686762362467164 | 0.4758518291908018 | 0.6414547278468419 |
| 0.5686762722467193 | 0.9758518211908154 | 0.6414547278468419 |
| 0.4273189170359331 | 0.0237545954187226 | 0.6276491881267319 |
| 0.4273189540359326 | 0.5237545824187251 | 0.6276491881267319 |
| 0.9273189560359327 | 0.0237545954187226 | 0.6276491881267319 |
| 0.9273189940359288 | 0.5237545824187251 | 0.6276491881267319 |
| 0.0623049852258291 | 0.0797081838950859 | 0.7294690605655987 |
| 0.0623050042258342 | 0.5797081608950876 | 0.7294690605655987 |
| 0.5623050052258307 | 0.0797081838950859 | 0.7294690605655987 |
| 0.5623050442258304 | 0.5797081608950876 | 0.7294690605655987 |
| 0.1541179542037341 | 0.2121999055471306 | 0.7956897143529034 |
| 0.1541179652037314 | 0.7121999165471280 | 0.7956897143529034 |
| 0.6541179742037357 | 0.2121999055471306 | 0.7956897143529034 |
| 0.6541179252037352 | 0.7121999165471280 | 0.7956897143529034 |
| 0.2373609601251019 | 0.3589101832134745 | 0.8763243639340743 |
| 0.2373609651251058 | 0.8589101362134741 | 0.8763243639340743 |
| 0.7373609201251057 | 0.3589101832134745 | 0.8763243639340743 |
| 0.7373609651251058 | 0.8589101362134741 | 0.8763243639340743 |
| 0.0776262871550912 | 0.5121882053341338 | 0.9586251306594988 |
| 0.0776263331550879 | 0.0121881593341300 | 0.9586251306594988 |
| 0.5776262481550916 | 0.5121882053341338 | 0.9586251306594988 |
| 0.5776262931550917 | 0.0121881593341300 | 0.9586251306594988 |
| 0.1196680453339667 | 0.3639819894547429 | 0.7217283518672843 |
| 0.1196680613339680 | 0.8639819814547423 | 0.7217283518672843 |
| 0.6196680253339650 | 0.3639819894547429 | 0.7217283518672843 |
| 0.6196680613339680 | 0.8639819814547423 | 0.7217283518672843 |
| 0.2079976873709910 | 0.9961995649258171 | 0.7980387193367022 |
| 0.2079976903709877 | 0.4961995279258176 | 0.7980387193367022 |
| 0.7079976473709877 | 0.9961995649258171 | 0.7980387193367022 |
| 0.7079976103709882 | 0.4961995279258176 | 0.7980387193367022 |
| 0.0541187200003108 | 0.1337209530415535 | 0.8703531674570542 |
| 0.0541187170003070 | 0.6337209450415529 | 0.8703531674570542 |
| 0.5541187200003108 | 0.1337209530415535 | 0.8703531674570542 |
| 0.5541187560003138 | 0.6337209450415529 | 0.8703531674570542 |
| 0.1363249250787959 | 0.2781693704766326 | 0.9554475185488371 |
| 0.1363249420787938 | 0.7781693624766319 | 0.9554475185488371 |
| 0.6363249450787976 | 0.2781693704766326 | 0.9554475185488371 |
| 0.6363249810787934 | 0.7781693624766319 | 0.9554475185488371 |
| 0.3125673164466392 | 0.0792637468194428 | 0.7287793314540352 |
| 0.3125673214466360 | 0.5792637048194464 | 0.7287793314540352 |
| 0.8125672364466396 | 0.0792637468194428 | 0.7287793314540352 |
| 0.8125672814466469 | 0.5792637048194464 | 0.7287793314540352 |
| 0.4038526328054459 | 0.2110171582449283 | 0.7970206359812124 |
| 0.4038526728054492 | 0.7110171312449296 | 0.7970206359812124 |
| 0.9038527118054560 | 0.2110171582449283 | 0.7970206359812124 |
| 0.9038526728054563 | 0.7110171312449296 | 0.7970206359812124 |
| 0.4956029623695315 | 0.3589744893847993 | 0.8761818140688504 |

|                    |                    |                    |
|--------------------|--------------------|--------------------|
| 0.4956029183695279 | 0.8589744813847915 | 0.8761818140688504 |
| 0.9956028823695320 | 0.3589744893847993 | 0.8761818140688504 |
| 0.9956029183695279 | 0.8589744813847915 | 0.8761818140688504 |
| 0.3274497167712980 | 0.5113482538759868 | 0.9576690270603478 |
| 0.3274497027712968 | 0.0113482838759893 | 0.9576690270603478 |
| 0.8274497567712942 | 0.5113482538759868 | 0.9576690270603478 |
| 0.8274497027712968 | 0.0113482838759893 | 0.9576690270603478 |
| 0.3634057485457234 | 0.3642092287605436 | 0.7207356390012407 |
| 0.3634057845457264 | 0.8642092207605430 | 0.7207356390012407 |
| 0.8634057485457234 | 0.3642092287605436 | 0.7207356390012407 |
| 0.8634057845457264 | 0.8642092207605430 | 0.7207356390012407 |
| 0.4568288305079307 | 0.0007803448771426 | 0.8025856749145888 |
| 0.4568288625079333 | 0.5007803518771397 | 0.8025856749145888 |
| 0.9568288305079307 | 0.0007803448771426 | 0.8025856749145888 |
| 0.9568287825079338 | 0.5007803518771397 | 0.8025856749145888 |
| 0.2917805102977269 | 0.1336676228548868 | 0.8701104612320165 |
| 0.2917805232977244 | 0.6336676248548798 | 0.8701104612320165 |
| 0.7917804902977252 | 0.1336676228548868 | 0.8701104612320165 |
| 0.7917805232977315 | 0.6336676248548798 | 0.8701104612320165 |
| 0.3860140165445571 | 0.2784159925381076 | 0.9547265741888609 |
| 0.3860140075445599 | 0.7784160045381086 | 0.9547265741888609 |
| 0.8860140165445500 | 0.2784159925381076 | 0.9547265741888609 |
| 0.8860139675445566 | 0.7784160045381086 | 0.9547265741888609 |
| 0.2060641797234126 | 0.4905774775196363 | 0.6552204377836688 |
| 0.2060641657234115 | 0.9905775085196353 | 0.6552204377836688 |
| 0.7060641397234093 | 0.4905774775196363 | 0.6552204377836688 |
| 0.7060641657234115 | 0.9905775085196353 | 0.6552204377836688 |
| 0.4848272137542367 | 0.4616806320489317 | 0.6444677159204986 |
| 0.4848272597542405 | 0.9616805850489314 | 0.6444677159204986 |
| 0.9848272137542367 | 0.4616806320489317 | 0.6444677159204986 |
| 0.9848272597542405 | 0.9616805850489314 | 0.6444677159204986 |
| 0.4651525662311968 | 0.4690902057696604 | 0.7236249053058401 |
| 0.4651525622311965 | 0.9690901977696669 | 0.7236249053058401 |
| 0.9651526062312001 | 0.4690902057696604 | 0.7236249053058401 |
| 0.9651525622311965 | 0.9690901977696669 | 0.7236249053058401 |
| 0.0553995253193165 | 0.1061282790591633 | 0.7992719878262662 |
| 0.0553995333193171 | 0.6061282430591675 | 0.7992719878262662 |
| 0.5553995303193133 | 0.1061282790591633 | 0.7992719878262662 |
| 0.5553995733193133 | 0.6061282430591675 | 0.7992719878262662 |
| 0.1446622588209792 | 0.2459114683381003 | 0.8726925450006959 |
| 0.1446622548209788 | 0.7459114603380925 | 0.8726925450006959 |
| 0.6446622188209759 | 0.2459114683381003 | 0.8726925450006959 |
| 0.6446622548209788 | 0.7459114603380925 | 0.8726925450006959 |
| 0.2307572112748701 | 0.3979806138278263 | 0.9529304492281341 |
| 0.2307572172748706 | 0.8979805678278296 | 0.9529304492281341 |
| 0.7307571322748743 | 0.3979806138278263 | 0.9529304492281341 |
| 0.7307571772748744 | 0.8979805678278296 | 0.9529304492281341 |
| 0.3054273512362187 | 0.1059029491985868 | 0.7991304691190066 |
| 0.3054273422362215 | 0.6059029611985949 | 0.7991304691190066 |
| 0.8054273512362187 | 0.1059029491985868 | 0.7991304691190066 |
| 0.8054273022362182 | 0.6059029611985949 | 0.7991304691190066 |
| 0.3952360522400937 | 0.2449153242326219 | 0.8739663226306078 |
| 0.3952360632400911 | 0.7449152582326235 | 0.8739663226306078 |
| 0.8952360922400899 | 0.2449153242326148 | 0.8739663226306078 |
| 0.8952360632400911 | 0.7449152582326235 | 0.8739663226306078 |
| 0.4814848325007048 | 0.3981872985749177 | 0.9525312538400073 |

|                    |                    |                    |
|--------------------|--------------------|--------------------|
| 0.4814848775007050 | 0.8981872515749174 | 0.9525312538400073 |
| 0.9814848325007048 | 0.3981872985749177 | 0.9525312538400073 |
| 0.9814848775007050 | 0.8981872515749174 | 0.9525312538400073 |
| 0.2134890420764961 | 0.4746013781894547 | 0.7254382123757779 |
| 0.2134890390764994 | 0.9746013701894611 | 0.7254382123757779 |
| 0.7134890420764961 | 0.4746013781894547 | 0.7254382123757779 |
| 0.7134889990764961 | 0.9746013701894611 | 0.7254382123757779 |

\*'OH<sub>2</sub> converged  $E_{\text{tot}} = -762.49$  [eV]

1.0

|               |               |               |
|---------------|---------------|---------------|
| 11.9568004608 | 0.0000000000  | 0.0000000000  |
| 2.9891864281  | 12.3485576688 | 0.0000000000  |
| 0.0000000000  | 0.0000000000  | 27.0132007599 |

H O Ni  
48 76 32

Direct

|             |             |             |
|-------------|-------------|-------------|
| 0.131827793 | 0.302972038 | 0.763754036 |
| 0.131827809 | 0.802972030 | 0.763754036 |
| 0.631827773 | 0.302972038 | 0.763754036 |
| 0.631827809 | 0.802972030 | 0.763754036 |
| 0.216869987 | 0.426427048 | 0.849704685 |
| 0.216870003 | 0.926426963 | 0.849704685 |
| 0.716869947 | 0.426427048 | 0.849704685 |
| 0.716870003 | 0.926426963 | 0.849704685 |
| 0.053204618 | 0.076285330 | 0.897548186 |
| 0.053204616 | 0.576285356 | 0.897548186 |
| 0.553204588 | 0.076285330 | 0.897548186 |
| 0.553204576 | 0.576285356 | 0.897548186 |
| 0.135425238 | 0.223777299 | 0.968417739 |
| 0.135425229 | 0.723777310 | 0.968417739 |
| 0.635425198 | 0.223777299 | 0.968417739 |
| 0.635425229 | 0.723777310 | 0.968417739 |
| 0.382445985 | 0.314996901 | 0.753208305 |
| 0.382445976 | 0.814996912 | 0.753208305 |
| 0.882445905 | 0.314996901 | 0.753208305 |
| 0.882445936 | 0.814996912 | 0.753208305 |
| 0.462387114 | 0.413340297 | 0.842082550 |
| 0.462387101 | 0.913340328 | 0.842082550 |
| 0.962387075 | 0.413340297 | 0.842082550 |
| 0.962387101 | 0.913340328 | 0.842082550 |
| 0.317255661 | 0.089017660 | 0.903523813 |
| 0.317255624 | 0.589017623 | 0.903523813 |
| 0.817255581 | 0.089017660 | 0.903523813 |
| 0.817255624 | 0.589017623 | 0.903523813 |

|             |             |             |
|-------------|-------------|-------------|
| 0.397561891 | 0.220210044 | 0.965899857 |
| 0.397561877 | 0.720210075 | 0.965899857 |
| 0.897561931 | 0.220210044 | 0.965899857 |
| 0.897561957 | 0.720210075 | 0.965899857 |
| 0.297023815 | 0.381888306 | 0.666772579 |
| 0.297023782 | 0.881888414 | 0.666772579 |
| 0.797023775 | 0.381888306 | 0.666772579 |
| 0.797023782 | 0.881888414 | 0.666772579 |
| 0.276087153 | 0.487806324 | 0.635966017 |
| 0.276087179 | 0.987806355 | 0.635966017 |
| 0.776087153 | 0.487806324 | 0.635966017 |
| 0.776087179 | 0.987806355 | 0.635966017 |
| 0.028521865 | 0.339643129 | 0.659344968 |
| 0.028521871 | 0.839643121 | 0.659344968 |
| 0.528521875 | 0.339643129 | 0.659344968 |
| 0.528521831 | 0.839643121 | 0.659344968 |
| 0.088357890 | 0.428531786 | 0.643313841 |
| 0.088357886 | 0.928531778 | 0.643313841 |
| 0.588357930 | 0.428531786 | 0.643313841 |
| 0.588357886 | 0.928531778 | 0.643313841 |
| 0.063893557 | 0.074052883 | 0.736209071 |
| 0.063893567 | 0.574052880 | 0.736209071 |
| 0.563893533 | 0.074052883 | 0.736209071 |
| 0.563893567 | 0.574052880 | 0.736209071 |
| 0.147696926 | 0.205350043 | 0.802094756 |
| 0.147696927 | 0.705350016 | 0.802094756 |
| 0.647696926 | 0.205350043 | 0.802094756 |
| 0.647696967 | 0.705350016 | 0.802094756 |
| 0.232552363 | 0.362202709 | 0.873967508 |
| 0.232552349 | 0.862202740 | 0.873967508 |
| 0.732552363 | 0.362202709 | 0.873967508 |
| 0.732552389 | 0.862202740 | 0.873967508 |
| 0.073218537 | 0.493544253 | 0.941495324 |
| 0.073218542 | 0.993544206 | 0.941495324 |
| 0.573218497 | 0.493544253 | 0.941495324 |
| 0.573218542 | 0.993544206 | 0.941495324 |
| 0.121668112 | 0.360422914 | 0.737182120 |
| 0.121668108 | 0.860422906 | 0.737182120 |
| 0.621668072 | 0.360422914 | 0.737182120 |
| 0.621668108 | 0.860422906 | 0.737182120 |
| 0.197832967 | 0.011509617 | 0.808290893 |
| 0.197833006 | 0.511509598 | 0.808290893 |
| 0.697833127 | 0.011509617 | 0.808290893 |
| 0.697833006 | 0.511509598 | 0.808290893 |
| 0.039734954 | 0.137406095 | 0.872157259 |
| 0.039734970 | 0.637406107 | 0.872157259 |
| 0.539734939 | 0.137406095 | 0.872157259 |
| 0.539734930 | 0.637406107 | 0.872157259 |
| 0.120477243 | 0.289003865 | 0.944883732 |
| 0.120477288 | 0.789003742 | 0.944883732 |
| 0.620477263 | 0.289003865 | 0.944883732 |
| 0.620477328 | 0.789003742 | 0.944883732 |
| 0.269424027 | 0.102387988 | 0.727716903 |
| 0.269424048 | 0.602387961 | 0.727716903 |
| 0.769424007 | 0.102387988 | 0.727716903 |
| 0.769423968 | 0.602387961 | 0.727716903 |

|             |             |             |
|-------------|-------------|-------------|
| 0.400555634 | 0.209526177 | 0.801500661 |
| 0.400555620 | 0.709526207 | 0.801500661 |
| 0.900555674 | 0.209526177 | 0.801500661 |
| 0.900555620 | 0.709526207 | 0.801500661 |
| 0.478685292 | 0.353831328 | 0.868235266 |
| 0.478685279 | 0.853831359 | 0.868235266 |
| 0.978685253 | 0.353831328 | 0.868235266 |
| 0.978685279 | 0.853831359 | 0.868235266 |
| 0.335527913 | 0.492876912 | 0.941832195 |
| 0.335527918 | 0.992876865 | 0.941832195 |
| 0.835527873 | 0.492876912 | 0.941832195 |
| 0.835527918 | 0.992876865 | 0.941832195 |
| 0.364825242 | 0.376709906 | 0.729563020 |
| 0.364825228 | 0.876709937 | 0.729563020 |
| 0.864825202 | 0.376709906 | 0.729563020 |
| 0.864825228 | 0.876709937 | 0.729563020 |
| 0.445447214 | 0.011829506 | 0.802046672 |
| 0.445447214 | 0.511829483 | 0.802046672 |
| 0.945447094 | 0.011829506 | 0.802046672 |
| 0.945447134 | 0.511829483 | 0.802046672 |
| 0.295890594 | 0.148469343 | 0.877402447 |
| 0.295890572 | 0.648469326 | 0.877402447 |
| 0.795890614 | 0.148469343 | 0.877402447 |
| 0.795890572 | 0.648469326 | 0.877402447 |
| 0.380367249 | 0.285539770 | 0.942525919 |
| 0.380367165 | 0.785539762 | 0.942525919 |
| 0.880367209 | 0.285539770 | 0.942525919 |
| 0.880367165 | 0.785539762 | 0.942525919 |
| 0.363570496 | 0.084435897 | 0.700761726 |
| 0.363570499 | 0.584435860 | 0.700761726 |
| 0.863570456 | 0.084435897 | 0.700761726 |
| 0.863570419 | 0.584435860 | 0.700761726 |
| 0.235481937 | 0.437200617 | 0.650537253 |
| 0.235481923 | 0.937200648 | 0.650537253 |
| 0.735481897 | 0.437200617 | 0.650537253 |
| 0.735481923 | 0.937200648 | 0.650537253 |
| 0.011091901 | 0.416194742 | 0.650189367 |
| 0.011091956 | 0.916194734 | 0.650189367 |
| 0.511091881 | 0.416194742 | 0.650189367 |
| 0.511091917 | 0.916194734 | 0.650189367 |
| 0.477909578 | 0.465617099 | 0.729506463 |
| 0.477909544 | 0.965617052 | 0.729506463 |
| 0.977909578 | 0.465617099 | 0.729506463 |
| 0.977909624 | 0.965617052 | 0.729506463 |
| 0.049017801 | 0.106049743 | 0.803403758 |
| 0.049017795 | 0.606049764 | 0.803403758 |
| 0.549017766 | 0.106049743 | 0.803403758 |
| 0.549017795 | 0.606049764 | 0.803403758 |
| 0.136167553 | 0.249363991 | 0.872379392 |
| 0.136167559 | 0.749364022 | 0.872379392 |
| 0.636167553 | 0.249363991 | 0.872379392 |
| 0.636167579 | 0.749364022 | 0.872379392 |
| 0.226043366 | 0.394706105 | 0.942931562 |
| 0.226043392 | 0.894706135 | 0.942931562 |
| 0.726043366 | 0.394706105 | 0.942931562 |
| 0.726043233 | 0.894706135 | 0.942931562 |

|             |             |             |
|-------------|-------------|-------------|
| 0.297244248 | 0.110678935 | 0.804575428 |
| 0.297244249 | 0.610678907 | 0.804575428 |
| 0.797244288 | 0.110678935 | 0.804575428 |
| 0.797244249 | 0.610678907 | 0.804575428 |
| 0.388076638 | 0.249553223 | 0.871180186 |
| 0.388076688 | 0.749553157 | 0.871180186 |
| 0.888076638 | 0.249553223 | 0.871180186 |
| 0.888076608 | 0.749553157 | 0.871180186 |
| 0.476924976 | 0.391182040 | 0.943712557 |
| 0.476924923 | 0.891182071 | 0.943712557 |
| 0.976924976 | 0.391182040 | 0.943712557 |
| 0.976925003 | 0.891182071 | 0.943712557 |
| 0.209393866 | 0.469393704 | 0.737024452 |
| 0.209393893 | 0.969393734 | 0.737024452 |
| 0.709393866 | 0.469393704 | 0.737024452 |
| 0.709393813 | 0.969393734 | 0.737024452 |

\*'OH converged  $E_{\text{tot}} = -741.21$  [eV]

1.0

|               |               |               |
|---------------|---------------|---------------|
| 11.9568004608 | 0.0000000000  | 0.0000000000  |
| 2.9891864281  | 12.3485576688 | 0.0000000000  |
| 0.0000000000  | 0.0000000000  | 27.0132007599 |

H O Ni  
44 76 32

Direct

|             |             |             |
|-------------|-------------|-------------|
| 0.128401633 | 0.306002972 | 0.766200463 |
| 0.128401624 | 0.806002983 | 0.766200463 |
| 0.628401593 | 0.306002972 | 0.766200463 |
| 0.628401624 | 0.806002983 | 0.766200463 |
| 0.222247441 | 0.412088946 | 0.843960229 |
| 0.222247408 | 0.912088976 | 0.843960229 |
| 0.722247381 | 0.412088946 | 0.843960229 |
| 0.722247408 | 0.912088976 | 0.843960229 |
| 0.054598279 | 0.070200255 | 0.895845262 |
| 0.054598311 | 0.570200242 | 0.895845262 |
| 0.554598274 | 0.070200255 | 0.895845262 |
| 0.554598391 | 0.570200242 | 0.895845262 |
| 0.138456126 | 0.220139475 | 0.967203916 |
| 0.138456137 | 0.720139487 | 0.967203916 |
| 0.638456106 | 0.220139475 | 0.967203916 |
| 0.638456137 | 0.720139487 | 0.967203916 |
| 0.383087733 | 0.325197137 | 0.756960627 |
| 0.383087719 | 0.825197168 | 0.756960627 |
| 0.883087693 | 0.325197137 | 0.756960627 |
| 0.883087719 | 0.825197168 | 0.756960627 |
| 0.472577153 | 0.405910692 | 0.840211225 |
| 0.472577189 | 0.905910685 | 0.840211225 |
| 0.972577153 | 0.405910692 | 0.840211225 |
| 0.972577269 | 0.905910685 | 0.840211225 |
| 0.317535009 | 0.082105832 | 0.901298884 |
| 0.317535050 | 0.582105804 | 0.901298884 |
| 0.817535168 | 0.082105832 | 0.901298884 |

|             |             |             |
|-------------|-------------|-------------|
| 0.817535050 | 0.582105804 | 0.901298884 |
| 0.404685559 | 0.217412112 | 0.965476703 |
| 0.404685551 | 0.717412123 | 0.965476703 |
| 0.904685520 | 0.217412112 | 0.965476703 |
| 0.904685551 | 0.717412123 | 0.965476703 |
| 0.269353499 | 0.388072042 | 0.659913010 |
| 0.269353495 | 0.888072034 | 0.659913010 |
| 0.769353499 | 0.388072042 | 0.659913010 |
| 0.769353455 | 0.888072034 | 0.659913010 |
| 0.102202135 | 0.439592457 | 0.657512972 |
| 0.102202171 | 0.939592372 | 0.657512972 |
| 0.602202076 | 0.439592457 | 0.657512972 |
| 0.602202131 | 0.939592372 | 0.657512972 |
| 0.465384784 | 0.492273980 | 0.638918350 |
| 0.465384829 | 0.992273934 | 0.638918350 |
| 0.965384784 | 0.492273980 | 0.638918350 |
| 0.965384829 | 0.992273934 | 0.638918350 |
| 0.066995988 | 0.072009778 | 0.732074548 |
| 0.066995994 | 0.572009809 | 0.732074548 |
| 0.566995908 | 0.072009778 | 0.732074548 |
| 0.566995974 | 0.572009809 | 0.732074548 |
| 0.146123663 | 0.204725352 | 0.801006899 |
| 0.146123709 | 0.704725383 | 0.801006899 |
| 0.646123663 | 0.204725352 | 0.801006899 |
| 0.646123689 | 0.704725383 | 0.801006899 |
| 0.237551460 | 0.353401314 | 0.869535654 |
| 0.237551445 | 0.853401267 | 0.869535654 |
| 0.737551400 | 0.353401314 | 0.869535654 |
| 0.737551445 | 0.853401267 | 0.869535654 |
| 0.071045691 | 0.491401826 | 0.942137645 |
| 0.071045657 | 0.991401780 | 0.942137645 |
| 0.571045691 | 0.491401826 | 0.942137645 |
| 0.571045657 | 0.991401780 | 0.942137645 |
| 0.119792335 | 0.362641296 | 0.739208923 |
| 0.119792361 | 0.862641327 | 0.739208923 |
| 0.619792335 | 0.362641296 | 0.739208923 |
| 0.619792361 | 0.862641327 | 0.739208923 |
| 0.200573690 | 0.006277300 | 0.800594830 |
| 0.200573696 | 0.506277331 | 0.800594830 |
| 0.700573690 | 0.006277300 | 0.800594830 |
| 0.700573636 | 0.506277331 | 0.800594830 |
| 0.044252057 | 0.130556234 | 0.869847247 |
| 0.044252053 | 0.630556226 | 0.869847247 |
| 0.544252037 | 0.130556234 | 0.869847247 |
| 0.544252073 | 0.630556226 | 0.869847247 |
| 0.124468370 | 0.284371556 | 0.943255441 |
| 0.124468376 | 0.784371510 | 0.943255441 |
| 0.624468410 | 0.284371556 | 0.943255441 |
| 0.624468376 | 0.784371510 | 0.943255441 |
| 0.269862388 | 0.109288773 | 0.725896205 |
| 0.269862392 | 0.609288736 | 0.725896205 |
| 0.769862548 | 0.109288773 | 0.725896205 |
| 0.769862431 | 0.609288736 | 0.725896205 |
| 0.407186182 | 0.207289298 | 0.798881809 |
| 0.407186187 | 0.707289252 | 0.798881809 |
| 0.907186142 | 0.207289298 | 0.798881809 |



|             |             |             |
|-------------|-------------|-------------|
| 0.907186267 | 0.707289252 | 0.798881809 |
| 0.485588936 | 0.350908999 | 0.867414801 |
| 0.485588892 | 0.850908991 | 0.867414801 |
| 0.985588856 | 0.350908999 | 0.867414801 |
| 0.985588892 | 0.850908991 | 0.867414801 |
| 0.335666652 | 0.490130936 | 0.942745580 |
| 0.335666678 | 0.990130966 | 0.942745580 |
| 0.835666652 | 0.490130936 | 0.942745580 |
| 0.835666678 | 0.990130966 | 0.942745580 |
| 0.364790719 | 0.385260962 | 0.732170080 |
| 0.364790675 | 0.885260954 | 0.732170080 |
| 0.864790719 | 0.385260962 | 0.732170080 |
| 0.864790675 | 0.885260954 | 0.732170080 |
| 0.452269046 | 0.007626294 | 0.795577212 |
| 0.452268999 | 0.507626300 | 0.795577212 |
| 0.952269006 | 0.007626294 | 0.795577212 |
| 0.952268959 | 0.507626300 | 0.795577212 |
| 0.298461710 | 0.140225739 | 0.874550306 |
| 0.298461719 | 0.640225760 | 0.874550306 |
| 0.798461650 | 0.140225739 | 0.874550306 |
| 0.798461679 | 0.640225760 | 0.874550306 |
| 0.387118139 | 0.281813827 | 0.941658640 |
| 0.387118095 | 0.781813819 | 0.941658640 |
| 0.887118059 | 0.281813827 | 0.941658640 |
| 0.887118095 | 0.781813819 | 0.941658640 |
| 0.364028552 | 0.093946068 | 0.700804444 |
| 0.364028576 | 0.593946108 | 0.700804444 |
| 0.864028631 | 0.093946068 | 0.700804444 |
| 0.864028576 | 0.593946108 | 0.700804444 |
| 0.210094620 | 0.454927478 | 0.664690207 |
| 0.210094636 | 0.954927392 | 0.664690207 |
| 0.710094620 | 0.454927478 | 0.664690207 |
| 0.710094596 | 0.954927392 | 0.664690207 |
| 0.011138000 | 0.434619990 | 0.659394111 |
| 0.011138016 | 0.934620020 | 0.659394111 |
| 0.511137990 | 0.434619990 | 0.659394111 |
| 0.511138016 | 0.934620020 | 0.659394111 |
| 0.478689382 | 0.468855568 | 0.729093124 |
| 0.478689368 | 0.968855598 | 0.729093124 |
| 0.978689422 | 0.468855568 | 0.729093124 |
| 0.978689448 | 0.968855598 | 0.729093124 |
| 0.052141051 | 0.104524237 | 0.800239601 |
| 0.052141082 | 0.604524248 | 0.800239601 |
| 0.552141051 | 0.104524237 | 0.800239601 |
| 0.552141082 | 0.604524248 | 0.800239601 |
| 0.140248163 | 0.244074245 | 0.871374146 |
| 0.140248174 | 0.744074179 | 0.871374146 |
| 0.640248163 | 0.244074245 | 0.871374146 |
| 0.640248293 | 0.744074179 | 0.871374146 |
| 0.229191269 | 0.389428619 | 0.942586924 |
| 0.229191275 | 0.889428572 | 0.942586924 |
| 0.729191229 | 0.389428619 | 0.942586924 |
| 0.729191275 | 0.889428572 | 0.942586924 |
| 0.299830242 | 0.109842586 | 0.801361775 |
| 0.299830256 | 0.609842588 | 0.801361775 |
| 0.799830142 | 0.109842586 | 0.801361775 |

|             |             |             |
|-------------|-------------|-------------|
| 0.799830176 | 0.609842588 | 0.801361775 |
| 0.392232402 | 0.245452465 | 0.869685626 |
| 0.392232428 | 0.745452496 | 0.869685626 |
| 0.892232482 | 0.245452465 | 0.869685626 |
| 0.892232428 | 0.745452496 | 0.869685626 |
| 0.479213066 | 0.388410308 | 0.943740659 |
| 0.479213081 | 0.888410223 | 0.943740659 |
| 0.979213106 | 0.388410308 | 0.943740659 |
| 0.979213161 | 0.888410223 | 0.943740659 |
| 0.209530547 | 0.471201186 | 0.733540582 |
| 0.209530513 | 0.971201139 | 0.733540582 |
| 0.709530547 | 0.471201186 | 0.733540582 |
| 0.709530513 | 0.971201139 | 0.733540582 |

Each displacement type was calculated with specific approach:

**IN-X:** In a specific layer, calculate the vector between two adjacent Ni atoms with different Z values, divide the result into 5 steps (each step describes specific sliding vector, layer is moving in) where at the last step, first Ni atom (closer to the surface) is located in the second Ni atom initial coordinates. all the atoms coordinate from the moving layer are shifted according to the sliding vector of each specific step.

**OUT-X:** In a specific layer, calculate the vector between two adjacent Ni atoms with different Z values, divide the result into 5 steps (each step describes specific sliding vector, layer is moving out) where at the last step, second Ni atom (farther from surface) is located in the first Ni atom initial coordinates. all the atoms coordinate from the moving layer are shifted according to the sliding vector of each specific step.

**90-X:** In a specific layer, calculate the vector between two adjacent Ni atoms with same Z values, divide the result into 4 steps (each step describes specific sliding vector, fifth step is identical to first step because of periodicity of the system in VASP calculations). all the atoms coordinate from the moving layer are shifted according to the sliding vector of each specific step.

**ROT X°:** In a specific layer, calculate the rotation matrix according to the facet axis. all the atoms coordinate from the moving layer are shifted according to the calculations of each specific step.

Examples of each displacement type POSCAR is presented referring to intermediate \*OH<sub>2</sub>:

```
*OH2 IN 1 Etot = -742.15 [eV]
1.0
11.383055687      0.0000000000      0.0000000000
2.8146468734     11.6314701430      0.0000000000
0.1444123649     -0.9612483604     27.2587363156
H      O      Ni
48     72     32
Direct
```

|             |             |             |
|-------------|-------------|-------------|
| 0.138674746 | 0.766859307 | 0.757078840 |
| 0.638530403 | 0.767462526 | 0.756534318 |
| 0.229970948 | 0.386166617 | 0.848429891 |
| 0.729826537 | 0.386769775 | 0.847885369 |
| 0.076362522 | 0.522928956 | 0.925495526 |
| 0.576218085 | 0.523532134 | 0.924951004 |
| 0.161291913 | 0.174200752 | 0.969173176 |
| 0.661147591 | 0.174803894 | 0.968628584 |
| 0.388461055 | 0.766807365 | 0.758100222 |
| 0.888316609 | 0.767410496 | 0.757555630 |
| 0.488094976 | 0.386709849 | 0.848176173 |
| 0.987950651 | 0.387313001 | 0.847631581 |
| 0.323275222 | 0.523159864 | 0.924531452 |
| 0.823130777 | 0.523762995 | 0.923986860 |
| 0.411304209 | 0.175087553 | 0.968319308 |
| 0.911159756 | 0.175690711 | 0.967774785 |
| 0.269859976 | 0.830445804 | 0.660028079 |
| 0.769715467 | 0.831049023 | 0.659483557 |
| 0.307217616 | 0.940359749 | 0.644620732 |
| 0.807073252 | 0.940962887 | 0.644076210 |
| 0.556546650 | 0.943470905 | 0.645041544 |
| 0.467007655 | 0.053122995 | 0.665298791 |
| 0.966863222 | 0.053726075 | 0.664754199 |
| 0.056402248 | 0.944073949 | 0.644496881 |
| 0.107252162 | 0.294591830 | 0.767506490 |
| 0.607107882 | 0.295194968 | 0.766961967 |
| 0.196960027 | 0.914662981 | 0.866117487 |
| 0.696815624 | 0.915266113 | 0.865572895 |
| 0.128280967 | 0.702696967 | 0.986860701 |
| 0.628136520 | 0.703300186 | 0.986316179 |
| 0.357038480 | 0.294539684 | 0.768527871 |
| 0.856893951 | 0.295142815 | 0.767983279 |
| 0.455083997 | 0.915206111 | 0.865863768 |
| 0.954939779 | 0.915809166 | 0.865319246 |
| 0.378293176 | 0.703583861 | 0.986006973 |
| 0.878148689 | 0.704186993 | 0.985462381 |
| 0.238437361 | 0.358178204 | 0.670455728 |
| 0.738292966 | 0.358781383 | 0.669911206 |
| 0.275794968 | 0.468092027 | 0.655048381 |
| 0.775650677 | 0.468695205 | 0.654503859 |
| 0.525124097 | 0.471203306 | 0.655469193 |
| 0.435585034 | 0.580855278 | 0.675726440 |
| 0.935440702 | 0.581458456 | 0.675181918 |
| 0.024979602 | 0.471806432 | 0.654924531 |
| 0.043351516 | 0.051425340 | 0.943183122 |
| 0.290264341 | 0.051656125 | 0.942218977 |
| 0.543207170 | 0.052028533 | 0.942638529 |
| 0.790119795 | 0.052259324 | 0.941674455 |
| 0.162163118 | 0.177092609 | 0.796795794 |
| 0.662018712 | 0.177695751 | 0.796251202 |
| 0.245481797 | 0.325191585 | 0.875265977 |
| 0.745337449 | 0.325794743 | 0.874721455 |
| 0.086839782 | 0.475684358 | 0.955285621 |
| 0.586695408 | 0.476287536 | 0.954741099 |
| 0.123533670 | 0.827395534 | 0.730815335 |
| 0.623389287 | 0.827998583 | 0.730270743 |

|             |             |             |
|-------------|-------------|-------------|
| 0.059696267 | 0.104123705 | 0.868846325 |
| 0.559551954 | 0.104726852 | 0.868301733 |
| 0.144152311 | 0.244416862 | 0.950707002 |
| 0.644007965 | 0.245020010 | 0.950162480 |
| 0.411892854 | 0.177011153 | 0.797555410 |
| 0.911748490 | 0.177614295 | 0.797010818 |
| 0.503551492 | 0.325357554 | 0.875003792 |
| 0.003407008 | 0.325960712 | 0.874459270 |
| 0.336652273 | 0.475193954 | 0.954108272 |
| 0.836507817 | 0.475797126 | 0.953563680 |
| 0.373616923 | 0.826225674 | 0.731272533 |
| 0.873472517 | 0.826828811 | 0.730728010 |
| 0.299589889 | 0.104417365 | 0.868586449 |
| 0.799445460 | 0.105020513 | 0.868041927 |
| 0.394082892 | 0.245084550 | 0.949746077 |
| 0.893938523 | 0.245687708 | 0.949201554 |
| 0.235707041 | 0.910653289 | 0.652158607 |
| 0.735562467 | 0.911256426 | 0.651614085 |
| 0.470692632 | 0.973959273 | 0.653996212 |
| 0.970548164 | 0.974562493 | 0.653451690 |
| 0.320828022 | 0.040040012 | 0.740869264 |
| 0.462482322 | 0.969572279 | 0.811926052 |
| 0.569426378 | 0.040958404 | 0.740568804 |
| 0.820683580 | 0.040643213 | 0.740324742 |
| 0.962337875 | 0.970175417 | 0.811381530 |
| 0.069570790 | 0.040355203 | 0.741113326 |
| 0.212107532 | 0.968603582 | 0.811230880 |
| 0.711963042 | 0.969206720 | 0.810686358 |
| 0.038148162 | 0.568087637 | 0.751541045 |
| 0.538003957 | 0.568690728 | 0.750996453 |
| 0.129152221 | 0.705588963 | 0.814483390 |
| 0.629007878 | 0.706192100 | 0.813938867 |
| 0.212470810 | 0.853687791 | 0.892953643 |
| 0.712326491 | 0.854290923 | 0.892409050 |
| 0.092111074 | 0.355127771 | 0.741242985 |
| 0.591966702 | 0.355730943 | 0.740698392 |
| 0.180684958 | 0.496335983 | 0.821658530 |
| 0.680540448 | 0.496939121 | 0.821114007 |
| 0.026685390 | 0.632620023 | 0.886533920 |
| 0.526540923 | 0.633223155 | 0.885989328 |
| 0.111141378 | 0.772913022 | 0.968394597 |
| 0.610996997 | 0.773516235 | 0.967850005 |
| 0.289405379 | 0.567772464 | 0.751296983 |
| 0.789261070 | 0.568375555 | 0.750752391 |
| 0.378881986 | 0.705507476 | 0.815243006 |
| 0.878737676 | 0.706110567 | 0.814698414 |
| 0.470540623 | 0.853853877 | 0.892691388 |
| 0.970396176 | 0.854457014 | 0.892146865 |
| 0.342194303 | 0.353958177 | 0.741700182 |
| 0.842049819 | 0.354561294 | 0.741155659 |
| 0.431059832 | 0.497304598 | 0.822353702 |
| 0.930915458 | 0.497907777 | 0.821809179 |
| 0.266578866 | 0.632913720 | 0.886274044 |
| 0.766434557 | 0.633516810 | 0.885729452 |
| 0.361072002 | 0.773580792 | 0.967433672 |
| 0.860927450 | 0.774184011 | 0.966889150 |

|             |             |             |
|-------------|-------------|-------------|
| 0.204284403 | 0.438385608 | 0.662586256 |
| 0.704139883 | 0.438988786 | 0.662041734 |
| 0.439270047 | 0.501691633 | 0.664423861 |
| 0.939125442 | 0.502294730 | 0.663879339 |
| 0.053828913 | 0.004180671 | 0.972973216 |
| 0.303641250 | 0.003690364 | 0.971795867 |
| 0.553684509 | 0.004783869 | 0.972428624 |
| 0.803496923 | 0.004293440 | 0.971251275 |
| 0.471984897 | 0.932833241 | 0.738027980 |
| 0.971840198 | 0.933436378 | 0.737483458 |
| 0.063481458 | 0.072660446 | 0.801243635 |
| 0.563337110 | 0.073263604 | 0.800699113 |
| 0.152267158 | 0.214064868 | 0.871340198 |
| 0.652122766 | 0.214668036 | 0.870795676 |
| 0.239341011 | 0.363144630 | 0.948689919 |
| 0.739196616 | 0.363747809 | 0.948145397 |
| 0.312489281 | 0.072641566 | 0.801056040 |
| 0.812344852 | 0.073244713 | 0.800511518 |
| 0.402286135 | 0.213970987 | 0.871875554 |
| 0.902141899 | 0.214574118 | 0.871330961 |
| 0.489904972 | 0.363790814 | 0.948280093 |
| 0.989760479 | 0.364393966 | 0.947735501 |
| 0.221962843 | 0.933503699 | 0.737976621 |
| 0.721818210 | 0.934106913 | 0.737432029 |
| 0.440562177 | 0.460565641 | 0.748455630 |
| 0.940417761 | 0.461168820 | 0.747911107 |
| 0.030470581 | 0.601156718 | 0.818931230 |
| 0.530326143 | 0.601759814 | 0.818386708 |
| 0.119256187 | 0.742561181 | 0.889027793 |
| 0.619111868 | 0.743164313 | 0.888483201 |
| 0.206330016 | 0.891640872 | 0.966377514 |
| 0.706185820 | 0.892244009 | 0.965832992 |
| 0.279478408 | 0.601137818 | 0.818743705 |
| 0.779334141 | 0.601740909 | 0.818199113 |
| 0.369275184 | 0.742467474 | 0.889563149 |
| 0.869130948 | 0.743070606 | 0.889018557 |
| 0.456893984 | 0.892286947 | 0.965967618 |
| 0.956749452 | 0.892890085 | 0.965423096 |
| 0.190540123 | 0.461236182 | 0.748404270 |
| 0.690395688 | 0.461839354 | 0.747859678 |

\*OH<sub>2</sub> out 1 **E<sub>tot</sub> = -742.24 [eV]**

|               |               |               |
|---------------|---------------|---------------|
| 1.0           |               |               |
| 11.3830556870 | 0.0000000000  | 0.0000000000  |
| 2.8146468734  | 11.6314701430 | 0.0000000000  |
| 0.1444123649- | 0.9612483604  | 27.2587363156 |
| H O Ni        |               |               |
| 48 72 32      |               |               |
| Direct        |               |               |
| 0.138674746   | 0.766859307   | 0.757078840   |
| 0.638530403   | 0.767462526   | 0.756534318   |
| 0.229970948   | 0.386166617   | 0.848429891   |
| 0.729826537   | 0.386769775   | 0.847885369   |
| 0.076362522   | 0.522928956   | 0.925495526   |

|             |             |             |
|-------------|-------------|-------------|
| 0.576218085 | 0.523532134 | 0.924951004 |
| 0.161291913 | 0.174200752 | 0.969173176 |
| 0.661147591 | 0.174803894 | 0.968628584 |
| 0.388461055 | 0.766807365 | 0.758100222 |
| 0.888316609 | 0.767410496 | 0.757555630 |
| 0.488094976 | 0.386709849 | 0.848176173 |
| 0.987950651 | 0.387313001 | 0.847631581 |
| 0.323275222 | 0.523159864 | 0.924531452 |
| 0.823130777 | 0.523762995 | 0.923986860 |
| 0.411304209 | 0.175087553 | 0.968319308 |
| 0.911159756 | 0.175690711 | 0.967774785 |
| 0.269859976 | 0.830445804 | 0.660028079 |
| 0.769715467 | 0.831049023 | 0.659483557 |
| 0.307217616 | 0.940359749 | 0.644620732 |
| 0.807073252 | 0.940962887 | 0.644076210 |
| 0.556546650 | 0.943470905 | 0.645041544 |
| 0.467007655 | 0.053122995 | 0.665298791 |
| 0.966863222 | 0.053726075 | 0.664754199 |
| 0.056402248 | 0.944073949 | 0.644496881 |
| 0.171685688 | 0.238363106 | 0.739391245 |
| 0.671541466 | 0.238966264 | 0.738846723 |
| 0.261393532 | 0.858434257 | 0.838002242 |
| 0.761249274 | 0.859037476 | 0.837457720 |
| 0.192714491 | 0.646468249 | 0.958745527 |
| 0.692570109 | 0.647071462 | 0.958200935 |
| 0.421471948 | 0.238310939 | 0.740412627 |
| 0.921327456 | 0.238914091 | 0.739868034 |
| 0.519517564 | 0.858977304 | 0.837748524 |
| 0.019373308 | 0.859580518 | 0.837203932 |
| 0.442726757 | 0.647355172 | 0.957891658 |
| 0.942582435 | 0.647958310 | 0.957347136 |
| 0.302870929 | 0.301949480 | 0.642340484 |
| 0.802726478 | 0.302552632 | 0.641795892 |
| 0.340228504 | 0.411863344 | 0.626933137 |
| 0.840084099 | 0.412466481 | 0.626388614 |
| 0.589557604 | 0.414974576 | 0.627353878 |
| 0.500018571 | 0.524626595 | 0.647611196 |
| 0.999874293 | 0.525229726 | 0.647066604 |
| 0.089413178 | 0.415577713 | 0.626809356 |
| 0.107785076 | 0.995196637 | 0.915067877 |
| 0.354697879 | 0.995427381 | 0.914103803 |
| 0.607640670 | 0.995799774 | 0.914523355 |
| 0.854553371 | 0.996030595 | 0.913559211 |
| 0.162163118 | 0.177092609 | 0.796795794 |
| 0.662018712 | 0.177695751 | 0.796251202 |
| 0.245481797 | 0.325191585 | 0.875265977 |
| 0.745337449 | 0.325794743 | 0.874721455 |
| 0.086839782 | 0.475684358 | 0.955285621 |
| 0.586695408 | 0.476287536 | 0.954741099 |
| 0.123533670 | 0.827395534 | 0.730815335 |
| 0.623389287 | 0.827998583 | 0.730270743 |
| 0.059696267 | 0.104123705 | 0.868846325 |
| 0.559551954 | 0.104726852 | 0.868301733 |
| 0.144152311 | 0.244416862 | 0.950707002 |
| 0.644007965 | 0.245020010 | 0.950162480 |
| 0.411892854 | 0.177011153 | 0.797555410 |

|             |             |             |
|-------------|-------------|-------------|
| 0.911748490 | 0.177614295 | 0.797010818 |
| 0.503551492 | 0.325357554 | 0.875003792 |
| 0.003407008 | 0.325960712 | 0.874459270 |
| 0.336652273 | 0.475193954 | 0.954108272 |
| 0.836507817 | 0.475797126 | 0.953563680 |
| 0.373616923 | 0.826225674 | 0.731272533 |
| 0.873472517 | 0.826828811 | 0.730728010 |
| 0.299589889 | 0.104417365 | 0.868586449 |
| 0.799445460 | 0.105020513 | 0.868041927 |
| 0.394082892 | 0.245084550 | 0.949746077 |
| 0.893938523 | 0.245687708 | 0.949201554 |
| 0.235707041 | 0.910653289 | 0.652158607 |
| 0.735562467 | 0.911256426 | 0.651614085 |
| 0.470692632 | 0.973959273 | 0.653996212 |
| 0.970548164 | 0.974562493 | 0.653451690 |
| 0.320828022 | 0.040040012 | 0.740869264 |
| 0.462482322 | 0.969572279 | 0.811926052 |
| 0.569426378 | 0.040958404 | 0.740568804 |
| 0.820683580 | 0.040643213 | 0.740324742 |
| 0.962337875 | 0.970175417 | 0.811381530 |
| 0.069570790 | 0.040355203 | 0.741113326 |
| 0.212107532 | 0.968603582 | 0.811230880 |
| 0.711963042 | 0.969206720 | 0.810686358 |
| 0.102581698 | 0.511858872 | 0.723425801 |
| 0.602437410 | 0.512462045 | 0.722881209 |
| 0.193585757 | 0.649360198 | 0.786368145 |
| 0.693441302 | 0.649963370 | 0.785823553 |
| 0.276904359 | 0.797459061 | 0.864838328 |
| 0.776759996 | 0.798062199 | 0.864293806 |
| 0.156544590 | 0.298899087 | 0.713127740 |
| 0.656400286 | 0.299502240 | 0.712583148 |
| 0.245118484 | 0.440107259 | 0.793543285 |
| 0.744974029 | 0.440710432 | 0.792998693 |
| 0.091118908 | 0.576391334 | 0.858418606 |
| 0.590974470 | 0.576994431 | 0.857874084 |
| 0.175574863 | 0.716684380 | 0.940279353 |
| 0.675430502 | 0.717287511 | 0.939734761 |
| 0.353838884 | 0.511543740 | 0.723181739 |
| 0.853694649 | 0.512146872 | 0.722637147 |
| 0.443315449 | 0.649278752 | 0.787127761 |
| 0.943171087 | 0.649881884 | 0.786583169 |
| 0.534974045 | 0.797625153 | 0.864576143 |
| 0.034829618 | 0.798228290 | 0.864031621 |
| 0.406627850 | 0.297729453 | 0.713584937 |
| 0.906483402 | 0.298332591 | 0.713040415 |
| 0.495493347 | 0.441075833 | 0.794238457 |
| 0.995349140 | 0.441679011 | 0.793693935 |
| 0.331012413 | 0.576684995 | 0.858158800 |
| 0.830868049 | 0.577288133 | 0.857614278 |
| 0.425505559 | 0.717352027 | 0.939318427 |
| 0.925360965 | 0.717955246 | 0.938773905 |
| 0.268717940 | 0.382156843 | 0.634471012 |
| 0.768573482 | 0.382760021 | 0.633926489 |
| 0.503703552 | 0.445462909 | 0.636308617 |
| 0.003559117 | 0.446066000 | 0.635764024 |
| 0.118262450 | 0.947951998 | 0.944857972 |

|             |             |             |
|-------------|-------------|-------------|
| 0.368074763 | 0.947461635 | 0.943680623 |
| 0.618118002 | 0.948555135 | 0.944313450 |
| 0.867930486 | 0.948064767 | 0.943136031 |
| 0.471984897 | 0.932833241 | 0.738027980 |
| 0.971840198 | 0.933436378 | 0.737483458 |
| 0.063481458 | 0.072660446 | 0.801243635 |
| 0.563337110 | 0.073263604 | 0.800699113 |
| 0.152267158 | 0.214064868 | 0.871340198 |
| 0.652122766 | 0.214668036 | 0.870795676 |
| 0.239341011 | 0.363144630 | 0.948689919 |
| 0.739196616 | 0.363747809 | 0.948145397 |
| 0.312489281 | 0.072641566 | 0.801056040 |
| 0.812344852 | 0.073244713 | 0.800511518 |
| 0.402286135 | 0.213970987 | 0.871875554 |
| 0.902141899 | 0.214574118 | 0.871330961 |
| 0.489904972 | 0.363790814 | 0.948280093 |
| 0.989760479 | 0.364393966 | 0.947735501 |
| 0.221962843 | 0.933503699 | 0.737976621 |
| 0.721818210 | 0.934106913 | 0.737432029 |
| 0.504995766 | 0.404336917 | 0.720340385 |
| 0.004851352 | 0.404940090 | 0.719795793 |
| 0.094904107 | 0.544927994 | 0.790815986 |
| 0.594759722 | 0.545531131 | 0.790271464 |
| 0.183689682 | 0.686332498 | 0.860912549 |
| 0.683545360 | 0.686935635 | 0.860368026 |
| 0.270763563 | 0.835412147 | 0.938262270 |
| 0.770619221 | 0.836015367 | 0.937717748 |
| 0.343911999 | 0.544909088 | 0.790628391 |
| 0.843767541 | 0.545512266 | 0.790083869 |
| 0.433708835 | 0.686238668 | 0.861447904 |
| 0.933564463 | 0.686841841 | 0.860903312 |
| 0.521327550 | 0.836058311 | 0.937852444 |
| 0.021183042 | 0.836661442 | 0.937307852 |
| 0.254973681 | 0.405007499 | 0.720289026 |
| 0.754829277 | 0.405610630 | 0.719744434 |

\*OH<sub>2</sub> 901 E<sub>tot</sub> = -742.36 [eV]

1.0

|               |               |               |
|---------------|---------------|---------------|
| 11.3830556870 | 0.0000000000  | 0.0000000000  |
| 2.8146468734  | 11.6314701430 | 0.0000000000  |
| 0.1444123649  | -0.9612483604 | 27.2587363156 |

H O Ni  
48 72 32

Direct

|             |             |             |
|-------------|-------------|-------------|
| 0.138674746 | 0.766859307 | 0.757078840 |
| 0.638530403 | 0.767462526 | 0.756534318 |
| 0.229970948 | 0.386166617 | 0.848429891 |
| 0.729826537 | 0.386769775 | 0.847885369 |
| 0.076362522 | 0.522928956 | 0.925495526 |
| 0.576218085 | 0.523532134 | 0.924951004 |
| 0.161291913 | 0.174200752 | 0.969173176 |
| 0.661147591 | 0.174803894 | 0.968628584 |
| 0.388461055 | 0.766807365 | 0.758100222 |
| 0.888316609 | 0.767410496 | 0.757555630 |



|             |             |             |
|-------------|-------------|-------------|
| 0.488094976 | 0.386709849 | 0.848176173 |
| 0.987950651 | 0.387313001 | 0.847631581 |
| 0.323275222 | 0.523159864 | 0.924531452 |
| 0.823130777 | 0.523762995 | 0.923986860 |
| 0.411304209 | 0.175087553 | 0.968319308 |
| 0.911159756 | 0.175690711 | 0.967774785 |
| 0.269859976 | 0.830445804 | 0.660028079 |
| 0.769715467 | 0.831049023 | 0.659483557 |
| 0.307217616 | 0.940359749 | 0.644620732 |
| 0.807073252 | 0.940962887 | 0.644076210 |
| 0.556546650 | 0.943470905 | 0.645041544 |
| 0.467007655 | 0.053122995 | 0.665298791 |
| 0.966863222 | 0.053726075 | 0.664754199 |
| 0.056402248 | 0.944073949 | 0.644496881 |
| 0.089667351 | 0.266481355 | 0.753486477 |
| 0.589523084 | 0.267084528 | 0.752941885 |
| 0.179375187 | 0.886552542 | 0.852097405 |
| 0.679230761 | 0.887155761 | 0.851552882 |
| 0.110696135 | 0.674586492 | 0.972840689 |
| 0.610551698 | 0.675189670 | 0.972296167 |
| 0.339453650 | 0.266429203 | 0.754507789 |
| 0.839309202 | 0.267032340 | 0.753963267 |
| 0.437499217 | 0.887095595 | 0.851843756 |
| 0.937354939 | 0.887698726 | 0.851299164 |
| 0.360708459 | 0.675473427 | 0.971986961 |
| 0.860563932 | 0.676076553 | 0.971442298 |
| 0.220852528 | 0.330067729 | 0.656435716 |
| 0.720708225 | 0.330670881 | 0.655891124 |
| 0.258210115 | 0.439981634 | 0.641028369 |
| 0.758065741 | 0.440584812 | 0.640483847 |
| 0.507539215 | 0.443092866 | 0.641449111 |
| 0.418000191 | 0.552744844 | 0.661706428 |
| 0.917855872 | 0.553347975 | 0.661161836 |
| 0.007394801 | 0.443695998 | 0.640904518 |
| 0.025766693 | 0.023314952 | 0.929163109 |
| 0.272679486 | 0.023545742 | 0.928198965 |
| 0.525622302 | 0.023918033 | 0.928618517 |
| 0.772534940 | 0.024148941 | 0.927654443 |
| 0.162163118 | 0.177092609 | 0.796795794 |
| 0.662018712 | 0.177695751 | 0.796251202 |
| 0.245481797 | 0.325191585 | 0.875265977 |
| 0.745337449 | 0.325794743 | 0.874721455 |
| 0.086839782 | 0.475684358 | 0.955285621 |
| 0.586695408 | 0.476287536 | 0.954741099 |
| 0.123533670 | 0.827395534 | 0.730815335 |
| 0.623389287 | 0.827998583 | 0.730270743 |
| 0.059696267 | 0.104123705 | 0.868846325 |
| 0.559551954 | 0.104726852 | 0.868301733 |
| 0.144152311 | 0.244416862 | 0.950707002 |
| 0.644007965 | 0.245020010 | 0.950162480 |
| 0.411892854 | 0.177011153 | 0.797555410 |
| 0.911748490 | 0.177614295 | 0.797010818 |
| 0.503551492 | 0.325357554 | 0.875003792 |
| 0.003407008 | 0.325960712 | 0.874459270 |
| 0.336652273 | 0.475193954 | 0.954108272 |
| 0.836507817 | 0.475797126 | 0.953563680 |

|             |             |             |
|-------------|-------------|-------------|
| 0.373616923 | 0.826225674 | 0.731272533 |
| 0.873472517 | 0.826828811 | 0.730728010 |
| 0.299589889 | 0.104417365 | 0.868586449 |
| 0.799445460 | 0.105020513 | 0.868041927 |
| 0.394082892 | 0.245084550 | 0.949746077 |
| 0.893938523 | 0.245687708 | 0.949201554 |
| 0.235707041 | 0.910653289 | 0.652158607 |
| 0.735562467 | 0.911256426 | 0.651614085 |
| 0.470692632 | 0.973959273 | 0.653996212 |
| 0.970548164 | 0.974562493 | 0.653451690 |
| 0.320828022 | 0.040040012 | 0.740869264 |
| 0.462482322 | 0.969572279 | 0.811926052 |
| 0.569426378 | 0.040958404 | 0.740568804 |
| 0.820683580 | 0.040643213 | 0.740324742 |
| 0.962337875 | 0.970175417 | 0.811381530 |
| 0.069570790 | 0.040355203 | 0.741113326 |
| 0.212107532 | 0.968603582 | 0.811230880 |
| 0.711963042 | 0.969206720 | 0.810686358 |
| 0.020563363 | 0.539977157 | 0.737520963 |
| 0.520419114 | 0.540580294 | 0.736976441 |
| 0.111567389 | 0.677478488 | 0.800463377 |
| 0.611423048 | 0.678081620 | 0.799918785 |
| 0.194886054 | 0.825577351 | 0.878933560 |
| 0.694741734 | 0.826180483 | 0.878388968 |
| 0.074526276 | 0.327017331 | 0.727222902 |
| 0.574381860 | 0.327620509 | 0.726678380 |
| 0.163100178 | 0.468225467 | 0.807638517 |
| 0.662955628 | 0.468828599 | 0.807093925 |
| 0.009100560 | 0.604509543 | 0.872513838 |
| 0.508956081 | 0.605112721 | 0.871969316 |
| 0.093556518 | 0.744802664 | 0.954374515 |
| 0.593412134 | 0.745405883 | 0.953829993 |
| 0.271820549 | 0.539661984 | 0.737276901 |
| 0.771676227 | 0.540265121 | 0.736732379 |
| 0.361297153 | 0.677397001 | 0.801222993 |
| 0.861152750 | 0.678000133 | 0.800678401 |
| 0.452955781 | 0.825743443 | 0.878671375 |
| 0.952811336 | 0.826346575 | 0.878126783 |
| 0.324609466 | 0.325847723 | 0.727680169 |
| 0.824465065 | 0.326450840 | 0.727135647 |
| 0.413475041 | 0.469194123 | 0.808333689 |
| 0.913330544 | 0.469797296 | 0.807789097 |
| 0.248994036 | 0.604803239 | 0.872253962 |
| 0.748849714 | 0.605406376 | 0.871709440 |
| 0.343487191 | 0.745470399 | 0.953413660 |
| 0.843342630 | 0.746073489 | 0.952869067 |
| 0.186699603 | 0.410275174 | 0.648566244 |
| 0.686555053 | 0.410878305 | 0.648021652 |
| 0.421685215 | 0.473581158 | 0.650403849 |
| 0.921540686 | 0.474184290 | 0.649859257 |
| 0.036244081 | 0.976070288 | 0.958953204 |
| 0.286056460 | 0.975579919 | 0.957775785 |
| 0.536099573 | 0.976673420 | 0.958408612 |
| 0.785912075 | 0.976182975 | 0.957231263 |
| 0.471984897 | 0.932833241 | 0.738027980 |
| 0.971840198 | 0.933436378 | 0.737483458 |

|             |             |             |
|-------------|-------------|-------------|
| 0.063481458 | 0.072660446 | 0.801243635 |
| 0.563337110 | 0.073263604 | 0.800699113 |
| 0.152267158 | 0.214064868 | 0.871340198 |
| 0.652122766 | 0.214668036 | 0.870795676 |
| 0.239341011 | 0.363144630 | 0.948689919 |
| 0.739196616 | 0.363747809 | 0.948145397 |
| 0.312489281 | 0.072641566 | 0.801056040 |
| 0.812344852 | 0.073244713 | 0.800511518 |
| 0.402286135 | 0.213970987 | 0.871875554 |
| 0.902141899 | 0.214574118 | 0.871330961 |
| 0.489904972 | 0.363790814 | 0.948280093 |
| 0.989760479 | 0.364393966 | 0.947735501 |
| 0.221962843 | 0.933503699 | 0.737976621 |
| 0.721818210 | 0.934106913 | 0.737432029 |
| 0.422977428 | 0.432455166 | 0.734435617 |
| 0.922832941 | 0.433058298 | 0.733891025 |
| 0.012885779 | 0.573046161 | 0.804911218 |
| 0.512741345 | 0.573649375 | 0.804366626 |
| 0.101671337 | 0.714450782 | 0.875007711 |
| 0.601527015 | 0.715053920 | 0.874463189 |
| 0.188745237 | 0.863530520 | 0.952357502 |
| 0.688600792 | 0.864133651 | 0.951812910 |
| 0.261893576 | 0.573027343 | 0.804723693 |
| 0.761749300 | 0.573630469 | 0.804179031 |
| 0.351690458 | 0.714356911 | 0.875543067 |
| 0.851546210 | 0.714960090 | 0.874998544 |
| 0.439309246 | 0.864176595 | 0.951947606 |
| 0.939164589 | 0.864779733 | 0.951403084 |
| 0.172955315 | 0.433125783 | 0.734384188 |
| 0.672810678 | 0.433728920 | 0.733839666 |

\*OH<sub>2</sub> 2 degrees **E<sub>tot</sub> = -741.82 [eV]**

1.0

|              |               |               |
|--------------|---------------|---------------|
| 11.383055687 | 0.0000000000  | 0.0000000000  |
| 2.8146468734 | 11.6314701430 | 0.0000000000  |
| 0.1444123649 | -0.9612483604 | 27.2587363156 |

H O Ni  
48 72 32

Direct

|             |             |             |
|-------------|-------------|-------------|
| 0.138674746 | 0.766859307 | 0.757078840 |
| 0.638530403 | 0.767462526 | 0.756534318 |
| 0.229970948 | 0.386166617 | 0.848429891 |
| 0.729826537 | 0.386769775 | 0.847885369 |
| 0.076362522 | 0.522928956 | 0.925495526 |
| 0.576218085 | 0.523532134 | 0.924951004 |
| 0.161291913 | 0.174200752 | 0.969173176 |
| 0.661147591 | 0.174803894 | 0.968628584 |
| 0.388461055 | 0.766807365 | 0.758100222 |
| 0.888316609 | 0.767410496 | 0.757555630 |
| 0.488094976 | 0.386709849 | 0.848176173 |
| 0.987950651 | 0.387313001 | 0.847631581 |
| 0.323275222 | 0.523159864 | 0.924531452 |
| 0.823130777 | 0.523762995 | 0.923986860 |
| 0.411304209 | 0.175087553 | 0.968319308 |

|             |             |             |
|-------------|-------------|-------------|
| 0.911159756 | 0.175690711 | 0.967774785 |
| 0.269859976 | 0.830445804 | 0.660028079 |
| 0.769715467 | 0.831049023 | 0.659483557 |
| 0.307217616 | 0.940359749 | 0.644620732 |
| 0.807073252 | 0.940962887 | 0.644076210 |
| 0.556546650 | 0.943470905 | 0.645041544 |
| 0.467007655 | 0.053122995 | 0.665298791 |
| 0.966863222 | 0.053726075 | 0.664754199 |
| 0.056402248 | 0.944073949 | 0.644496881 |
| 0.157583973 | 0.254393319 | 0.748271393 |
| 0.654045596 | 0.267289727 | 0.752969874 |
| 0.224610285 | 0.880190810 | 0.849358420 |
| 0.721071741 | 0.893087218 | 0.854056901 |
| 0.154996747 | 0.665235691 | 0.968829683 |
| 0.651458243 | 0.678132018 | 0.973528164 |
| 0.405608542 | 0.260481424 | 0.751911687 |
| 0.902069940 | 0.273377894 | 0.756610168 |
| 0.480973903 | 0.887083358 | 0.851812758 |
| 0.977435421 | 0.899979849 | 0.856511239 |
| 0.403329645 | 0.672274952 | 0.970599835 |
| 0.899790967 | 0.685171396 | 0.975298246 |
| 0.291818899 | 0.321633331 | 0.652772331 |
| 0.788280436 | 0.334529745 | 0.657470882 |
| 0.326914799 | 0.433110516 | 0.638034686 |
| 0.823376307 | 0.446006883 | 0.642733167 |
| 0.574436561 | 0.442369507 | 0.641077629 |
| 0.481442321 | 0.550440727 | 0.660667064 |
| 0.977904050 | 0.563337048 | 0.665365474 |
| 0.070897952 | 0.455265834 | 0.645776110 |
| 0.063977525 | 0.013918401 | 0.925142308 |
| 0.309255719 | 0.020221711 | 0.926768037 |
| 0.560439072 | 0.026814815 | 0.929840858 |
| 0.805717138 | 0.033118012 | 0.931466518 |
| 0.162163118 | 0.177092609 | 0.796795794 |
| 0.662018712 | 0.177695751 | 0.796251202 |
| 0.245481797 | 0.325191585 | 0.875265977 |
| 0.745337449 | 0.325794743 | 0.874721455 |
| 0.086839782 | 0.475684358 | 0.955285621 |
| 0.586695408 | 0.476287536 | 0.954741099 |
| 0.123533670 | 0.827395534 | 0.730815335 |
| 0.623389287 | 0.827998583 | 0.730270743 |
| 0.059696267 | 0.104123705 | 0.868846325 |
| 0.559551954 | 0.104726852 | 0.868301733 |
| 0.144152311 | 0.244416862 | 0.950707002 |
| 0.644007965 | 0.245020010 | 0.950162480 |
| 0.411892854 | 0.177011153 | 0.797555410 |
| 0.911748490 | 0.177614295 | 0.797010818 |
| 0.503551492 | 0.325357554 | 0.875003792 |
| 0.003407008 | 0.325960712 | 0.874459270 |
| 0.336652273 | 0.475193954 | 0.954108272 |
| 0.836507817 | 0.475797126 | 0.953563680 |
| 0.373616923 | 0.826225674 | 0.731272533 |
| 0.873472517 | 0.826828811 | 0.730728010 |
| 0.299589889 | 0.104417365 | 0.868586449 |
| 0.799445460 | 0.105020513 | 0.868041927 |
| 0.394082892 | 0.245084550 | 0.949746077 |

|             |             |              |
|-------------|-------------|--------------|
| 0.893938523 | 0.245687708 | 0.949201554  |
| 0.235707041 | 0.910653289 | 0.652158607  |
| 0.735562467 | 0.911256426 | 0.651614085  |
| 0.470692632 | 0.973959273 | 0.653996212  |
| 0.970548164 | 0.974562493 | 0.653451690  |
| 0.320828022 | 0.040040012 | 0.740869264  |
| 0.462482322 | 0.969572279 | 0.811926052  |
| 0.569426378 | 0.040958404 | 0.740568804  |
| 0.820683580 | 0.040643213 | 0.740324742  |
| 0.962337875 | 0.970175417 | 0.811381530  |
| 0.069570790 | 0.040355203 | 0.7411113326 |
| 0.212107532 | 0.968603582 | 0.811230880  |
| 0.711963042 | 0.969206720 | 0.810686358  |
| 0.082661518 | 0.527780339 | 0.732268934  |
| 0.579123163 | 0.540676660 | 0.736967345  |
| 0.165771408 | 0.668274027 | 0.796498833  |
| 0.662232823 | 0.681170348 | 0.801197244  |
| 0.240069191 | 0.819227784 | 0.876199894  |
| 0.736530754 | 0.832124269 | 0.880898305  |
| 0.142470667 | 0.314923177 | 0.722005229  |
| 0.638932165 | 0.327819668 | 0.726703710  |
| 0.222056952 | 0.459074401 | 0.803689087  |
| 0.718518386 | 0.471970892 | 0.808387568  |
| 0.061754559 | 0.592319032 | 0.867279582  |
| 0.558215974 | 0.605215435 | 0.871977993  |
| 0.137191495 | 0.735447583 | 0.950362810  |
| 0.633652930 | 0.748343991 | 0.955061291  |
| 0.332227258 | 0.533640902 | 0.734658688  |
| 0.828688879 | 0.546537316 | 0.739357239  |
| 0.413755776 | 0.674331408 | 0.799876732  |
| 0.910217231 | 0.687227816 | 0.804575213  |
| 0.496389314 | 0.825739888 | 0.878644226  |
| 0.992850771 | 0.838636290 | 0.883342637  |
| 0.390852287 | 0.319895141 | 0.725081759  |
| 0.887313752 | 0.332791509 | 0.729780239  |
| 0.470658149 | 0.466203859 | 0.807011988  |
| 0.967119616 | 0.479100391 | 0.811710469  |
| 0.300018970 | 0.598512442 | 0.869535969  |
| 0.796480603 | 0.611408810 | 0.874234450  |
| 0.385455299 | 0.742264622 | 0.952024505  |
| 0.881916744 | 0.755161072 | 0.956722986  |
| 0.256239025 | 0.401469474 | 0.644747031  |
| 0.752700522 | 0.414365883 | 0.649445512  |
| 0.487845182 | 0.470917473 | 0.649206768  |
| 0.984306595 | 0.483813881 | 0.653905248  |
| 0.073904098 | 0.966639500 | 0.954918828  |
| 0.322093389 | 0.972288960 | 0.956359901  |
| 0.570365469 | 0.979535909 | 0.959617308  |
| 0.818554888 | 0.985185532 | 0.961058382  |
| 0.471984897 | 0.932833241 | 0.738027980  |
| 0.971840198 | 0.933436378 | 0.737483458  |
| 0.063481458 | 0.072660446 | 0.801243635  |
| 0.563337110 | 0.073263604 | 0.800699113  |
| 0.152267158 | 0.214064868 | 0.871340198  |
| 0.652122766 | 0.214668036 | 0.870795676  |
| 0.239341011 | 0.363144630 | 0.948689919  |

|             |             |             |
|-------------|-------------|-------------|
| 0.739196616 | 0.363747809 | 0.948145397 |
| 0.312489281 | 0.072641566 | 0.801056040 |
| 0.812344852 | 0.073244713 | 0.800511518 |
| 0.402286135 | 0.213970987 | 0.871875554 |
| 0.902141899 | 0.214574118 | 0.871330961 |
| 0.489904972 | 0.363790814 | 0.948280093 |
| 0.989760479 | 0.364393966 | 0.947735501 |
| 0.221962843 | 0.933503699 | 0.737976621 |
| 0.721818210 | 0.934106913 | 0.737432029 |
| 0.485345659 | 0.429532763 | 0.733134418 |
| 0.981807072 | 0.442429172 | 0.737832899 |
| 0.070260132 | 0.560809360 | 0.799649603 |
| 0.566721544 | 0.573705856 | 0.804348153 |
| 0.150649288 | 0.705169750 | 0.871018956 |
| 0.647110869 | 0.718066158 | 0.875717437 |
| 0.228715762 | 0.857202995 | 0.949641538 |
| 0.725177281 | 0.870099485 | 0.954340019 |
| 0.317580775 | 0.566912568 | 0.802073013 |
| 0.814042322 | 0.579808942 | 0.806771564 |
| 0.398934237 | 0.711222052 | 0.874175674 |
| 0.895396040 | 0.724118414 | 0.878874084 |
| 0.477577229 | 0.864013636 | 0.951860771 |
| 0.974038537 | 0.876909963 | 0.956559251 |
| 0.237014306 | 0.424060321 | 0.730463096 |
| 0.733475845 | 0.436956729 | 0.735161577 |

[1] Li, Y.-F.; Selloni, A., Mechanism and Activity of Water Oxidation on Selected Surfaces of Pure and Fe-Doped Niox. ACS Catalysis 2014, 4, 1148-1153.
